# 1 Severe deficiency of voltage-gated sodium channel Nav1.2 2 elevates neuronal excitability in adult mice

3 **Short title: Nav1.2 deficiency and neuronal hyperexcitability**

4

5 Jingliang Zhang<sup>1,2\*</sup>, Xiaoling Chen<sup>1,2,3\*</sup>, Muriel Eaton<sup>1,2</sup>, Shirong Lai<sup>1,2</sup>, Anthony Park<sup>1,2</sup>,  
6 Talha S. Ahmad<sup>1,2</sup>, Jiayang Wu<sup>1,2</sup>, Zhixiong Ma<sup>1,2</sup>, Zhefu Que<sup>1,2</sup>, Ji Hea Lee<sup>1,2</sup>, Tiange  
7 Xiao<sup>1,2</sup>, Yuansong Li<sup>1,2</sup>, Yujia Wang<sup>1,2</sup>, Maria I. Olivero-Acosta<sup>1,2</sup>, James A. Schaber<sup>4</sup>,  
8 Krishna Jayant<sup>2,3</sup>, Zhuo Huang<sup>5</sup>, Nadia A. Lanman<sup>6,7</sup>, William C. Skarnes<sup>8</sup>, Yang Yang<sup>1,2†</sup>

9

10 <sup>1</sup>Department of Medicinal Chemistry and Molecular Pharmacology, College of Pharmacy,  
11 Purdue University.

12 <sup>2</sup>Purdue Institute for Integrative Neuroscience, Purdue University.

13 <sup>3</sup>Weldon School of Biomedical Engineering, Purdue University.

14 <sup>4</sup>Bioscience Imaging Facility, Bindley Bioscience Center, Purdue University.

15 <sup>5</sup>Department of Molecular and Cellular Pharmacology, School of Pharmaceutical  
16 Sciences, Peking University Health Science Center.

17 <sup>6</sup>Department of Comparative Pathobiology, Purdue University.

18 <sup>7</sup>Purdue University Center for Cancer Research, Purdue University.

19 <sup>8</sup>The Jackson Laboratory for Genomic Medicine.

20 \*These authors contributed equally to this work.

21 †Corresponding author. Email: [yangyang@purdue.edu](mailto:yangyang@purdue.edu)

22

## 23 **Abstract**

24 *Scn2a* encodes voltage-gated sodium channel Nav1.2, which mediates neuronal firing.  
25 The current paradigm suggests that Nav1.2 gain-of-function variants enhance neuronal  
26 excitability resulting in epilepsy, whereas Nav1.2 deficiency impairs neuronal excitability  
27 contributing to autism. In this paradigm, however, why about a third of patients with  
28 Nav1.2 deficiency still develop seizures remains a mystery. Here we challenge the  
29 conventional wisdom, reporting that neuronal excitability is increased with severe Nav1.2  
30 deficiency. Using a unique gene-trap knockout mouse model of *Scn2a*, we found  
31 enhanced intrinsic excitabilities of principal neurons in the cortico-striatal circuit, known  
32 to be involved in *Scn2a*-related seizures. This increased excitability is autonomous, and  
33 is reversible by genetic restoration of *Scn2a* expression in adult mice. Mechanistic  
34 investigation reveals a compensatory downregulation of potassium channels including  
35 Kv1.1, which could be targeted to alleviate neuronal hyperexcitability. Our unexpected  
36 findings may explain Nav1.2 deficiency-related epileptic seizures in humans and provide  
37 molecular targets for potential interventions.

38

39 **KEYWORDS:** Voltage-gated sodium channel, Nav1.2, *SCN2A/Scn2a* gene, gene-trap  
40 knockout, channelopathy, neuronal excitability, epilepsy, seizures, potassium channel,  
41 Kv1.1

42 **TEASER:**

43 Severe Nav1.2 deficiency results in neuronal hyperexcitability via the compensatory  
44 downregulation of potassium channels.

45

46 **HIGHLIGHTS:**

47 1. Severe Nav1.2 deficiency results in enhanced excitability of medium spiny neurons  
48 (MSNs) and pyramidal neurons in adult mice;

49 2. Increased neuronal excitability in MSNs is accompanied by elevated voltage threshold;

50 3. Nav1.2 deficiency-related hyperexcitability is reversible with the restoration of *Scn2a*  
51 expression, and is autonomous;

52 4. The expression of the Kv1.1 channel has a compensatory reduction in neurons with  
53 Nav1.2 deficiency, and Kv channels openers normalize the neuronal excitability;

54 5. The enhanced excitability in brain slices translates to elevated *in vivo* firing commonly  
55 associated with seizures.

56

## 57 INTRODUCTION

58 Nav1.2 channel, encoded by *SCN2A*, is a major voltage-gated sodium channel expressed  
59 in the central nervous system (CNS) supporting the action potentials (AP) firing (1) (2).  
60 Nav1.2 is strongly expressed in the principal neurons of the cortico-striatal circuit,  
61 including pyramidal neurons of the medial prefrontal cortex (mPFC) and medium spiny  
62 neurons (MSNs) of the caudate-putamen (CPu) in the striatum (3-5). Gain-of-function  
63 (GoF) variants of *SCN2A* are closely associated with epileptic seizures, whereas loss-of-  
64 function (LoF) or protein-truncating variants of *SCN2A* (collectively referred to as Nav1.2  
65 deficiency) are leading genetic causes of autism spectrum disorder (ASD) and intellectual  
66 disability (ID) (6-10). The conventional paradigm suggests that GoF variants of *SCN2A*  
67 increase the excitability of principal neurons resulting in epilepsy, whereas Nav1.2  
68 deficiency impairs the excitability of principal neurons leading to ASD (2). However,  
69 clinical studies found that a significant portion of patients with Nav1.2 deficiency develop  
70 “late-onset” intractable seizures (11, 12). As hyperexcitability and hypersynchronization  
71 of neuronal firings are suggested as the basis of seizures (13), it is thus intriguing how  
72 Nav1.2 deficiency, predicted to reduce neuronal excitability, contributes to epileptic  
73 seizures.

74 To understand Nav1.2 deficiency-related pathophysiology, mouse models were  
75 generated. Homozygous *Scn2a*<sup>-/-</sup> knockout mice die perinatally (14, 15); Heterozygous  
76 *Scn2a*<sup>+/-</sup> mice (with ~50% Nav1.2 expression level) survive to adulthood, but the earlier  
77 study did not find notable abnormalities in *Scn2a*<sup>+/-</sup> mice (14). More recently, absence-  
78 like seizures were reported in adult male *Scn2a*<sup>+/-</sup> mice (16). It is suggested that the CPu  
79 of the striatum and the mPFC of the cortex are key brain regions in which absence  
80 seizure-like spike-wave discharges (SWDs) were identified (16, 17). Indeed, the cortico-  
81 striatal circuit is highly involved in ASD as well as seizures, and the excitability of principal  
82 neurons in this circuit could strongly influence seizure susceptibility (18, 19). Despite  
83 these *in vivo* findings, recordings in brain slices, however, revealed unchanged AP firings  
84 and reduced excitatory postsynaptic current in pyramidal neurons of adult *Scn2a*<sup>+/-</sup> mice  
85 (16, 20), leaving cellular mechanisms ambiguous.

86 It is not uncommon that phenotypes observed in hemizygous patients do not  
87 manifest in heterozygous mouse models. In fact, it is known that mice are more tolerant  
88 than humans to certain gene expression reduction (21). Therefore, the heterozygous  
89 knockout with a close to 50% reduction in *Scn2a* protein level may not be sufficient to  
90 render major phenotypes in mice (21). A more substantial reduction of gene expression  
91 could be essential to produce robust phenotypes in the mouse model of Nav1.2  
92 deficiency. Because *Scn2a* null (100% knockout) is lethal, we thus generated a novel  
93 Nav1.2-deficient mouse model via a gene-trap knockout (gtKO) strategy (22). These mice  
94 display many behavioral abnormalities, modeling aspects of phenotypes in humans with  
95 *SCN2A* deficiency (22). Using this unique mouse model, we investigated how severe  
96 Nav1.2 deficiency affects neuronal excitabilities of principal neurons in the cortico-striatal  
97 circuit. Our results demonstrate a surprising hyperexcitability phenotype in neurons, in  
98 which the compensatory downregulation of the potassium channels is likely to be an  
99 underlying mechanism.

100

## 101 RESULTS

### 102 Neurons expressing substantially low Nav1.2 exhibit elevated excitability

103 To understand how a severe Nav1.2 deficiency affects the function of neurons, we utilized  
104 a gene-trap knockout mouse model of *Scn2a*. Homozygous *Scn2a<sup>gtKO/gtKO</sup>* mice (referred  
105 to as HOM herein) can survive to adulthood, and have a substantial reduction of Nav1.2  
106 expression (~25% of the WT level) (22). Because the gene-trap cassette contains a *LacZ*  
107 element, which is driven by the native Nav1.2 promoter (**Figure S1A**) (23, 24), we used  
108 *LacZ*-staining as a surrogate to determine the expression and distribution of Nav1.2 in the  
109 brain. Our data showed that *Scn2a* is widely expressed in the mouse brain including the  
110 cortex and striatum (**Figure S1B**), which is consistent with previous studies of *Scn2a*  
111 distribution (3-5).

112 The CPU is a common node for ASD and seizures, and is one of the major brain  
113 regions involved in the *Scn2a*-related absence-like seizures (16-18). Previous study and  
114 our *LacZ*-staining suggested that Nav1.2 is highly expressed in the CPU. To further  
115 confirm these results, we performed Western blot analysis. We found that the  
116 heterozygous (HET) *Scn2a<sup>WT/gtKO</sup>* mice have ~60% of WT Nav1.2 protein level in the CPU  
117 tissues, whereas the homozygous (HOM) *Scn2a<sup>gtKO/gtKO</sup>* mice have a much lower level at  
118 34% (**Figure S1C**). This result is largely consistent with our initial characterization of this  
119 mouse model using whole-brain samples (22). To understand how a severe deficiency of  
120 Nav1.2 affects neuronal excitability, we performed *ex vivo* patch-clamp recordings in brain  
121 slices from adult *Scn2a<sup>gtKO/gtKO</sup>* mice. Unexpectedly, we found that the striatal principal  
122 medium spiny neurons (MSNs) from *Scn2a<sup>gtKO/gtKO</sup>* mice were markedly more excitable  
123 (**Figure 1A-C**). The current-injection triggered action potential (AP) number was  
124 significantly elevated in MSNs from *Scn2a<sup>gtKO/gtKO</sup>* mice compared to WT littermates. We  
125 also observed depolarized resting membrane potential (RMP) and increased input  
126 resistance of these MSNs (**Figure 1D, E**), which were in line with the increased neuronal  
127 excitability. Phase-plane plot analysis showed that the AP waveform in *Scn2a<sup>gtKO/gtKO</sup>*  
128 mice was altered (**Figure 1F, G**). While rheobase was reduced, interestingly we detected  
129 a higher voltage threshold, reduced AP amplitude, elevated fast after-hyperpolarization  
130 (fAHP), and increased half-width values in MSNs from *Scn2a<sup>gtKO/gtKO</sup>* mice (**Figure 1H-L**).  
131 Voltage-dependent conductance can affect neuronal RMP (25), and RMP is known to  
132 influence neuronal excitability (26). We thus performed recordings at a fixed membrane  
133 potential (MP) to understand whether the altered RMP is a major factor for this observed  
134 hyperexcitability of MSNs. However, even at the fixed MP, we were still able to detect the  
135 enhanced excitability along with the altered AP waveforms in *Scn2a<sup>gtKO/gtKO</sup>* mice (**Figure**  
136 **S1D-M**), suggesting that besides the RMP, other factors are playing essential roles  
137 contributing to the neuronal hyperexcitability. Taken together, our data suggest a  
138 counterintuitive finding that severe deficiency of Nav1.2 renders an increased (rather than  
139 conventionally suggested as decreased) neuronal excitability.

140

### 141 Enhanced excitability is reversible in adult Nav1.2-deficient mice with the 142 restoration of *Scn2a* expression, and is autonomous

143 *Scn2a<sup>gtKO/gtKO</sup>* mice, generated via a gene-trap strategy, has a built-in genetic “rescue”  
144 element for manipulations (24, 27). The inserted “tm1a” trapping cassette is flanked with

145 *Frt* sites, which can be removed via a flippase recombinase (Flp) to achieve a “tm1c”  
146 allele in a temporally and spatially controlled manner (24) (**Figure S1A**). This “tm1c” allele  
147 is practically a “rescue” allele to restore the expression of the target gene. We performed  
148 experiments to restore the *Scn2a* expression by adeno-associated virus (AAV) delivery  
149 of codon-optimized Flp (FlpO), with a goal to determine the reversibility of these enhanced  
150 neuronal firings in adult mice. Using a PHP.eB.AAV vector, which can be administered  
151 via systemic delivery (**Figure 2A**) to transduce neurons across the brain (28), we studied  
152 the *LacZ* signals (**Figure 2B**) and the protein expression level of *Scn2a*. We found that  
153 the FlpO treatment resulted in a partial but significant elevation of Nav1.2 protein  
154 expression in adult *Scn2a<sup>gtKO/gtKO</sup>* mice compared to control PHP.eB.AAV transduction  
155 (**Figure 2C**). Remarkably, this partial restoration of *Scn2a* expression in adult mice  
156 translated into changes in neuronal excitability. We found that the adult *Scn2a<sup>gtKO/gtKO</sup>*  
157 mice transduced with the AAV-FlpO displayed decreased neuronal excitability of striatal  
158 MSNs (**Figure 2D-E**). In the FlpO-treated group, the triggered AP firing of MSNs in  
159 *Scn2a<sup>gtKO/gtKO</sup>* mice was reduced to the WT range, together with the correction of other  
160 parameters including the RMP, AP waveform among others (**Figure 2D-J**). Collectively,  
161 our data show that even with a partial restoration of *Scn2a* expression to ~50-60% of WT  
162 expression level, we are still able to achieve an almost full rescue of neuronal excitability  
163 in adult mice.

164 In the cortico-striatal circuit, principal pyramidal neurons of the mPFC project to  
165 the striatum, and are suggested to be involved in seizure initiation. As the mPFC is also  
166 implicated in the absence-like seizures of *Scn2a<sup>+/-</sup>* mice (16, 17), we studied the  
167 excitability of layer V pyramidal neurons of the mPFC. We found that the excitability of  
168 these neurons was increased significantly compared to the WT mice, and can be reversed  
169 by FlpO mediated partial restoration of *Scn2a* expression as well (**Figure S2**). Together,  
170 our data suggest that the Nav1.2 deficiency-related hyperexcitability exists along the  
171 cortico-striatal circuit, manifested in the principal neurons of both cortex and striatum brain  
172 regions.

173 The hyperexcitability seen in neurons with Nav1.2 deficiency could come from the  
174 altered intrinsic properties independent of other neurons (autonomous), or a result of a  
175 disrupted circuit. To distinguish these possibilities, we performed AAV injections of FlpO-  
176 mCherry to transduce only a few MSNs in the CPu sparsely. We then performed patch-  
177 clamp recordings on adjacent neurons with or without fluorescence (AAV-negative/non-  
178 transduced neurons versus AAV-positive/transduced neurons) (**Figure 3A**). Strikingly,  
179 our data showed that the transduced neurons (showing fluorescence) display greatly  
180 decreased neuronal excitability, compared to non-transduced neurons (showing non-  
181 fluorescence) in the same brain slices. In particular, we found that the RMP, input  
182 resistance, and the altered AP waveform were reversed in FlpO-transduced neurons of  
183 *Scn2a<sup>gtKO/gtKO</sup>* mice (**Figure 3B-L**). Moreover, when we performed the recordings at a  
184 fixed membrane potential of -80 mV, similar findings could still be obtained (**Figure S3A-  
185 J**). On the other hand, non-transduced neurons displayed hyperexcitability similarly to  
186 neurons from *Scn2a<sup>gtKO/gtKO</sup>* mice without virus transduction. Our data indicate that the  
187 hyperexcitability of each MSN can be modulated by the expression level of *Scn2a*  
188 autonomously, and the Nav1.2 deficiency-related hyperexcitability is the intrinsic property  
189 of a particular neuron independent of its surrounding neurons or circuit.



## 190 **Downregulation of potassium channels contributes to the elevated action potential** 191 **firings**

192 To reveal the possible molecular basis underlying the enhanced neuronal excitability of  
193 *Scn2a<sup>gtKO/gtKO</sup>* mice, we studied the gene expression profile using RNA sequencing (RNA-  
194 seq). We identified around nine hundred genes that were significantly up- or down-  
195 regulated in *Scn2a<sup>gtKO/gtKO</sup>* mice compared to WT littermates (**Figure 4A**). *Scn2a*  
196 expression was at 29.6% of the WT value (**Figure 4B**), consistent with our qPCR (**Figure**  
197 **S4A**) and Western blot study (**Figure 2C and Figure S1C**). Nav1.6 and Nav1.2 are two  
198 major sodium channels often working in a coordinated fashion in principal neurons in the  
199 CNS, and the dysfunction of Nav1.6 is involved in seizures (29-32). In Nav1.6-deficient  
200 mouse models, Nav1.2 was upregulated, suggesting a compensatory relationship (33,  
201 34). Interestingly, we detected a slightly reduced expression of Nav1.6 in *Scn2a<sup>gtKO/gtKO</sup>*  
202 mice in our RNA-seq analysis. This reduction of Nav1.6 did not reach statistical  
203 significance (91.4±2.3% of WT, n = 4, p = 0.39) by qPCR validation (**Figure S4A**),  
204 indicating that our observed neuronal hyperexcitability is not likely to result from the  
205 compensation of the Nav1.6 channel expression.

206 Besides the Nav channels, potassium channels are also known to be major  
207 mediators setting the neuronal excitability (35, 36), and are often co-localized with Nav in  
208 the axon with high expression to regulate excitability (37, 38). Indeed, as the AP waveform  
209 was altered markedly in neurons with severe Nav1.2 deficiency, it is likely that the  
210 functions or expressions of potassium channels, which are responsible for many aspects  
211 of AP waveform, were disrupted in these neurons. Thus, we expanded our survey to  
212 include potassium channels. Notably, we found multiple potassium channel genes to be  
213 significantly downregulated (*Kcne2*, *Kcng4*, *Kcnv1*, *Kcna1*, *Kcna2*, *Kcnj10*, and *Kcnk1*) in  
214 our RNA-seq analysis (**Figure 4B**). As the top three genes are regulatory subunits or  
215 modifiers, we mainly focused on Kv1.1 and Kv1.2 (encoded by *Kcna1* and *Kcna2*,  
216 respectively), which are known to be involved in seizures (39). Our qPCR experiment  
217 validated that Kv1.1 and Kv1.2 were significantly downregulated (**Figure S4B**).

218 To understand the contribution of potassium channels towards neuronal  
219 excitability, we tested pimaric acid (PiMA, 10 μM) on MSNs in the brain slices of  
220 *Scn2a<sup>gtKO/gtKO</sup>* mice. PiMA is a relatively general K channel opener but with demonstrated  
221 properties as a Kv1.1-Kv2.1 opener (40). While it might not be surprising that PiMA can  
222 affect neurons from WT mice, it was quite remarkable that PiMA almost completely  
223 rescued the excitability of MSNs from *Scn2a<sup>gtKO/gtKO</sup>* mice to the WT range (**Figure 4C-**  
224 **M**). By pre-incubation of 10 μM PiMA for 10 min or more, we found that PiMA could  
225 significantly rescue the AP firings of MSNs from *Scn2a<sup>gtKO/gtKO</sup>* mice towards the WT  
226 range (**Figure 4C-D**). Strikingly, most of the parameters, including input resistance, RMP,  
227 AP rheobase, voltage threshold, amplitude, fAHP, and half-width values were reversed  
228 towards the WT values in the presence of PiMA as well (**Figure 4E-M**).

229 As a selective Kv1.1 opener (4-Trifluoromethyl-L-phenylglycine, 4TFMPG, 100  
230 μM) was recently reported (41), we further investigated the role of the specific Kv1.1 in  
231 MSNs of *Scn2a<sup>gtKO/gtKO</sup>* mice. Notably, we found that the pre-incubation of 100 μM  
232 4TFMPG for 10 min or more could significantly reverse the hyperexcitability of MSNs as  
233 well as the RMP and rheobase values of *Scn2a<sup>gtKO/gtKO</sup>* mice (**Figure S4C-E, I, N-O, and**  
234 **T**). Interestingly, different from the relatively broad potassium channels opener (PiMA),

235 4TFMPG was not able to rescue the AP voltage threshold, amplitude, fAHP, half-width,  
236 or input-resistance (**Figure S4F-M** and **Figure S4Q-X**).

237 To further understand whether the change of expressions in these Kv channels is  
238 due to Nav1.2 deficiency, we performed the qPCR experiment with striatal tissues from  
239 mice injected with AAV-FlpO, in which the expression of *Scn2a* was restored. Our data  
240 revealed that after the restoration of *Scn2a* expression by FlpO, the expressions of Kv1.1  
241 and Kv1.2 were increased (**Figure S4B**), suggesting that neurons have a dynamic  
242 adaptation mechanism to regulate gene expression in responses to the change of *Scn2a*  
243 expression level. Taken together, our data indicate that Kv channels (especially Kv1.1)  
244 are important mediators of the hyperexcitability phenotypes observed in MSNs with  
245 severe Nav1.2 deficiency.

246

### 247 ***In vivo* neuronal firing in the CPu region is enhanced in adult Nav1.2-deficient mice**

248 To test whether the enhanced neuronal excitability in brain slices translates into increased  
249 neuronal firing *in vivo*, we performed high-density *Neuropixels* recording on *Scn2a<sup>gtKO/gtKO</sup>*  
250 and WT mice. The whole experiment pipeline consists of five steps, including surgery to  
251 implant headplate, recovery, recording, and postmortem imaging (**Figure S5A**). Mice  
252 were allowed to recover for 14 days before *in vivo* recording. The *Neuropixels* probe,  
253 consisting of ~300 recording electrodes across 3-mm length, was inserted into the CPu  
254 region to record the neuronal firing of mice in their resting-state (**Figure S5B-C**). After  
255 spike-sorting, units were manually verified and clear action potential waveform could be  
256 identified from both *Scn2a<sup>gtKO/gtKO</sup>* and WT mice (**Figure S5D**). A published set of criteria  
257 were used to isolate putative MSNs (42, 43). Notably, our data demonstrated that putative  
258 MSNs from the CPu region of *Scn2a<sup>gtKO/gtKO</sup>* mice display a higher mean firing frequency  
259 compared to WT mice (**Figure S5E**). Together, our data suggest that the neuronal  
260 hyperexcitability observed in brain slice recording can manifest as enhanced *in vivo* firings  
261 of head-fixed mice in their resting-state.

262

## 263 **DISCUSSION**

264 Here in this paper, we report a counterintuitive finding that severe Nav1.2 deficiency  
265 renders hyperexcitability of principal MSNs in the striatum and pyramidal neurons in the  
266 mPFC, challenging the conventional paradigm. We further demonstrated that this  
267 hyperexcitability is reversible even in adult mice, showing a dynamic adaptive ability of  
268 neurons. Moreover, we provided evidence to suggest that the compensatory reduction in  
269 expressions of Kv channels is a possible mechanism underlying this hyperexcitability,  
270 revealing a remarkable interplay between neuronal excitability and gene regulation. *In*  
271 *vivo* study further demonstrated that this elevated neuronal excitability identified in brain  
272 slices can be translated into enhanced neuronal firing in live mice. Our data thus provided  
273 a plausible explanation for the mysterious epileptic seizure phenotypes in humans with  
274 *SCN2A* deficiency, and identified molecular targets for potential therapeutic interventions.

275 Nav1.2 channel plays a variety of roles in the initiation, propagation, and  
276 backpropagation of APs during development and adulthood (20, 44-47). In the early stage  
277 of development, Nav1.2 is suggested to be the main sodium channel expressed in the

278 axon initial segment (AIS) (1, 48, 49). Later in the development, Nav1.6 becomes the  
279 dominating channel in the axon and distal AIS, while the expression of Nav1.2 is re-  
280 distributed to other parts of the neurons including proximal AIS and dendrites (20, 25, 47,  
281 50). A recent study found that pyramidal neurons of the mPFC from adult *Scn2a*<sup>+/-</sup> mice  
282 have impaired excitatory postsynaptic current but intact AP firing (20). Here we revealed  
283 that severe Nav1.2 deficiency beyond a 50% reduction level in neurons surprisingly leads  
284 to hyperexcitability, which is an intrinsic property of the neurons that can be modulated in  
285 adulthood. However, how severe Nav1.2 deficiency changes neuronal excitability during  
286 early development remains to be determined. It is also worth noting that the expression  
287 of Nav1.2 in parvalbumin (PV) or somatostatin (SST) interneurons is limited (5, 20), and  
288 Nav1.2 does not seem to play a functional role in these interneurons (20). Nevertheless,  
289 it is still possible that while the expression of Nav1.2 in PV and SST interneurons is low,  
290 the severe reduction of *Scn2a* in principal neurons may result in compensatory  
291 adaptation, which indirectly affects the excitability of interneurons. It would be interesting  
292 to further explore these possibilities in a future study.

293 Because of the strong expression of *SCN2A* in principal neurons and its key roles  
294 to support AP firing, it is well accepted that increased Nav1.2 channel activity leads to  
295 enhanced excitability of principal neurons and aggravates seizures (2, 12, 51).  
296 Intriguingly, Nav1.2 deficiency, which is mainly found in ASD/ID cases, and conventionally  
297 expected to impair neuronal excitability, is also associated with epilepsies (6, 10, 52). It  
298 is estimated that 20~30% of ASD/ID patients with Nav1.2 deficiency develop “late-onset”  
299 seizures (2, 11). Treating epileptic seizures in these patients with Nav1.2 deficiency is  
300 extremely difficult, and the use of sodium channel blockers has been shown to  
301 exacerbate, rather than alleviate, the seizures (11). Our current data, together with  
302 published studies on *Scn2a*<sup>+/-</sup> mice (20), may suggest a new paradigm. A moderate  
303 deficiency of Nav1.2 (i.e., loss-of-function variants) may impair neuronal excitability  
304 contributing to ASD and ID, whereas a severe deficiency of Nav1.2 (i.e., protein-truncating  
305 variants) tips the balance, resulting in neuronal hyperexcitability and increased seizure  
306 susceptibility. Notably, an independent study by the Bender lab (Spratt et al, co-  
307 submission) found that 100% knockout of *Scn2a* in a subset of pyramidal neurons in the  
308 mPFC results in hyperexcitability as well.

309 Potassium channels are known to play major roles in neuronal excitability and  
310 epileptic seizures (53-57). The AP waveform, which is highly influenced by the  
311 orchestration of a variety of potassium channels, is strongly disrupted in neurons with  
312 Nav1.2 deficiency, further suggesting the involvement of potassium channels. Our RNA-  
313 seq results identified multiple potassium channels to be significantly downregulated in  
314 *Scn2a*<sup>gtKO/gtKO</sup> mice, including voltage-gated potassium channels (i.e., Kv1.1 and Kv1.2),  
315 as well as two-pore potassium channels (*Kcnk1*) and inward rectifier potassium channels  
316 (*Kcnj10*) (**Figure 4A-B**). Kv1.1, for example, is abundantly expressed in principal neurons  
317 of the CNS, and contributes to the threshold as well as the interspike intervals during  
318 repetitive firing (35). Additionally, it is known that Kv1.1 can form heteromultimeric  
319 channels with Kv1.2 (35), which was identified to be downregulated in  
320 *Scn2a*<sup>gtKO/gtKO</sup> mice by our RNA-seq analysis as well.

321 In this current study, we have obtained evidence to show that PiMA markedly  
322 reverses the elevated action potential firings associated with severe Nav1.2 deficiency



323 **(Figure 4C-D)**. PiMA is a relatively general potassium channels opener, with  
324 demonstrated properties as a  $K_v1.1$ - $K_v2.1$  and large-conductance  $Ca^{2+}$ -activated K  
325 channel (BK) opener (40). It is worth noting that besides increased action potential firings,  
326 neurons from *Scn2a<sup>gtKO/gtKO</sup>* mice display reduced action potential amplitude, higher  
327 voltage-threshold, increased input resistance, and elevated fAHP (**Figure 1** and **Figure**  
328 **S1**), which could be modulated by different potassium channels (58, 59). The reduced  
329 driving force on  $K_v$  channels due to the change of AP waveform, including fAHP, might  
330 contribute to the hyperexcitability phenotypes as well. Nevertheless, PiMA turns out to  
331 rescue most of these altered parameters (**Figure 4**), which is unexpected but may  
332 indicate that PiMA has additional targets beyond  $K_v1.1$ - $K_v2.1$  and BK channels.  
333 Importantly, a relatively selective  $K_v1.1$  opener (4TFMPG) is also able to reduce neuronal  
334 hyperexcitability, suggesting that the enhanced action potential firing in *Scn2a<sup>gtKO/gtKO</sup>*  
335 mice could be largely attributed to the  $K_v1.1$  channel (**Figure S4C-E, N-O**). Notably,  
336 4TFMPG was not able to restore the input resistance, AP voltage threshold, amplitude,  
337 fAHP, or half-width values (**Figure S4F-M** and **Figure S4Q-X**), largely fitting the notion  
338 that 4TFMPG is selective for  $K_v1.1$  (41). Viral delivery of a specific gene is a different  
339 approach to elucidate the precise role of each distinct potassium channel towards  
340 neuronal excitability. Indeed, AAV- $K_v1.1$  has been suggested as novel gene therapy to  
341 reduce seizures (60, 61). It would be appealing to test the effect of AAV- $K_v1.1$  in  
342 *Scn2a<sup>gtKO/gtKO</sup>* mice in a follow-up study. However, as several other potassium channels  
343 were also found to be downregulated, a multiple-gene delivery approach might be needed  
344 to deeply assess the contributions of this collection of ion channels toward neuronal  
345 hyperexcitability.

346 In summary, our results reveal an unexpected hyperexcitability phenotype in  
347 neurons with severe  $Nav1.2$  deficiency, which is reversible and likely due to the  
348 compensatory reduction in expressions of potassium channels. The maladaptation or  
349 “over-compensatory” from potassium channels is likely a cause leading to the  
350 hyperexcitability of neurons to promote seizures. While it is a demonstrated clinical  
351 observation that patients with *SCN2A* deficiency often develop intractable seizures, there  
352 are no disease models that exist thus far for mechanistic investigation of this observation.  
353 Neuronal hyperexcitability identified in this unique  $Nav1.2$ -deficient mouse model is the  
354 first step towards the understanding of disease mechanisms underlying severe *SCN2A*  
355 deficiency. Our findings may explain the puzzling clinical observation that a portion of  
356 patients with  $Nav1.2$  deficiency still develop seizures, and guide further development of  
357 interventions targeting  $K_v$  channels to treat  $Nav1.2$  deficiency-related disorders (62).

358

## 359 **MATERIALS AND METHODS**

### 360 **Mouse strains**

361 C57BL/6N-*Scn2a<sup>tm1aNarl/Narl</sup>* (referred to as *Scn2a<sup>WT/gtKO</sup>*) mice were generated from the  
362 National Laboratory Animal Center Rodent Model Resource Center based on a modified  
363 gene-trap design (23, 24). The generation and basic characterization of this mouse model  
364 are available in our recent article (22). The targeting construct (tm1a trapping cassette)  
365 was electroporated into C57BL/6N embryonic stem cells, and founders in a pure  
366 C57BL/BN background were obtained to produce mice for experiments. All animal

367 experiments were approved by the Institutional Animal Care and Use Committee  
368 (IACUC). Mice were same-sex housed in mixed-genotype groups (3-5 mice per cage) on  
369 vented cage racks with 1/8" Bed-o-cobb bedding (Anderson, Maumee, OH, USA) and >  
370 8 g of nesting material as enrichment (shredded paper, crinkle-cut paper, and/or cotton  
371 nestles) on a 12hr light cycle. Food (2018S Teklad from Envigo) and reverse osmosis  
372 water were given *ad-lib*. Heterozygous (HET, *Scn2a*<sup>WT/gtKO</sup>) mice were used as breeding  
373 pairs to obtain homozygous (HOM, *Scn2a*<sup>gtKO/gtKO</sup>) mice and WT littermates for study.  
374 Whenever possible, investigators were blind to the genotype of the mice.

375

## 376 Reagents

377 Reagents used were as follows: N-(2-aminoethyl) biotin amide hydrochloride  
378 (NEUROBIOTIN™ Tracer, SP-1120, from Vector Laboratories), Alexa 488-conjugated  
379 streptavidin (Molecular Probes, Eugene, OR, USA), Tetrodotoxin citrate (sodium channel  
380 blocker) was solubilized in pure water at a stock concentration of 500 µM; Pimaric acid  
381 (PiMA, K<sub>v</sub> channels opener) was solubilized in DMSO at a 1000× stock concentration of  
382 10 mM; 4-(Trifluoromethyl)-L-phenylglycine (4TFMPG, K<sub>v</sub>1.1 specific opener) was  
383 solubilized in 1 M hydrochloric acid at a 1000× stock concentration of 100 mM; (2-  
384 Fluorophenyl) glycine (2FPG, K<sub>v</sub>1.1 specific opener) was solubilized in 0.25 M  
385 hydrochloric acid at a 1000× stock concentration of 100 mM.

386

## 387 Antibodies

388 Primary antibodies used were: Rabbit anti-SCN2A (Nav1.2) (1: 1000, Alomone Labs,  
389 ASC-002), mouse anti-β-Actin (1:2000, Cell Signaling Technology, 3700S), and GAPDH  
390 (D16H11) XP® Rabbit mAb (1:2000, Cell Signaling Technology, 5174S). Secondary  
391 antibodies were: IRDye® 680RD Goat anti-Rabbit IgG Secondary Antibody (1:5000, LI-  
392 COR Biosciences, AB\_10956166) and IRDye® 680RD Goat anti-Mouse IgG Secondary  
393 Antibody (1:5000, LI-COR Biosciences, AB\_10956588).

394

## 395 Genotyping

396 Mice were labeled and genotyped via ear punch at weaning (21-28 days old). Genotyping  
397 for the tm1a cassette was performed using gene-specific polymerase chain reaction  
398 (PCR) on DNA extracted from ear tissues with a tissue DNA extraction kit (Macherey-  
399 Nagel, Bethlehem, PA, USA) with primers (forward 5' to 3':  
400 GAGGCAAAGAATCTGTACTGTGGGG, reverse:  
401 GACGCCTGTGAATAAAACCAAGGAA). The wild type allele's PCR product is 240 base  
402 pairs (bp) and the tm1a (gtKO) allele's PCR product is 340 bp.

403

## 404 Adeno-associated virus (AAV) production

405 pAAV-EF1a-mCherry-IRES-Flpo was a gift from Karl Deisseroth (63) (Addgene plasmid  
406 # 55634 and viral prep # 55634-AAVrg; <http://n2t.net/addgene:55634>; RRID:  
407 Addgene\_55634), AAV9-PHP.eB-EF1a-mCherry-IRES-Flpo with the titer of 2.56×10<sup>13</sup>

408 GC/mL was packed by Penn Vector Core (<http://pennvectorcore.med.upenn.edu/>);  
409 Control virus, PHP.eB-Ef1a-DO-mCherry-WPRE-pA with the titer of  $1.2 \times 10^{13}$  GC/mL was  
410 packed by Bio-Detail Corporation.

411

## 412 **Surgical procedures**

413 For all surgeries (except as noted), mice were systemically anesthetized with ketamine  
414 and xylazine, and received analgesic buprenorphine to help postoperative recovery.

415

## 416 **AAV injections**

417 For systemic delivery of virus, each adult mouse received  $2 \times 10^{11}$  infections of FlpO- or  
418 control AAV virus via tail vein injection. For viral injection into the brain to label neurons  
419 sparsely, mice were anesthetized with ketamine/xylazine (100/10 mg/kg, i.p.) and  
420 secured in a stereotaxic apparatus with ear-bars (RWD Ltd, China). After exposing the  
421 skull via a small incision, small holes for each hemisphere were drilled for injection based  
422 on coordinates to bregma. Mice were bilaterally injected with AAV virus (diluted into  
423  $\sim 5 \times 10^{10}$  infections units per mL with PBS) into the caudate nucleus and the putamen  
424 (CPU, dorsal striatum) (coordinates of the injection sites relative to bregma: AP +1.30 mm,  
425 ML  $\pm 1.25$  mm, DV -3.30 mm; AP +0.50 mm, ML  $\pm 2.00$  mm, DV -3.25 mm, 0.5-1  $\mu$ L per  
426 point) and the nucleus accumbens (NAc, ventral striatum) (coordinates of the injection  
427 sites relative to bregma: AP +1.30 mm, ML  $\pm 1.25$  mm, DV -4.50 mm, 0.5-1  $\mu$ L per point)  
428 with sharpened glass pipettes (Sutter Instrument), self-made to have a bevel of  $35^\circ$  and  
429 an opening of 20- $\mu$ m diameter at the tip (64), attached to syringe needles (200- $\mu$ m  
430 diameter). The pipette was filled from the back end with mineral oil and attached to a  
431 syringe needle mounted in a microinjection syringe pump (World Precision Instruments,  
432 UMP3T-2). Before injection, the viral suspension was suctioned through the tip of the  
433 pipette. The skull over the target coordinates was thinned with a drill and punctured with  
434 the tip of the pipette. The pipette was inserted slowly (120  $\mu$ m/min) to the desired depth.  
435 The virus was slowly ( $\sim 100$ -150 nL/min) injected to the desired location. Before being  
436 retracted out of the brain, the pipette was left at the same place for 10 min when the  
437 injection was finished. The virus was allowed to express for at least three weeks before  
438 electrophysiological recordings. Animals were allowed to recover from surgery for one  
439 week and their body weight and health conditions were closely monitored during recovery.  
440 The accurate location of injection sites and viral infectivity were confirmed in all mice *post-*  
441 *hoc* by imaging of sections (50  $\mu$ m in thickness) containing the relevant brain regions.

442

## 443 **Perfusions and tissue processing**

444 For immunostaining, mice were administered an overdose of anesthesia and  
445 transcardiacally perfused with ice-cold PBS followed by 4% paraformaldehyde (PFA) (For  
446 *LacZ* staining, 4% PFA was replaced by 2% formaldehyde + 0.2% glutaraldehyde in PBS,  
447 hereinafter inclusive). After perfusion, brain slices were dissected out and post-fixed in  
448 4% PFA overnight at  $4^\circ\text{C}$ . Tissues were cryoprotected by sinking in gradient sucrose  
449 (10%, 20%, and 30%) with 0.01 M PBS at  $4^\circ\text{C}$  and subsequently frozen in 20% sucrose  
450 and 30% sucrose in 1 $\times$  phosphate-buffered saline (PBS) for 24-48 hrs. Samples were

451 frozen in Optimal Cutting Temperature compound using dry ice and stored at -80°C.  
452 Tissue sections of 20 µm in thickness were taken on a cryostat (Leica CM1950) and  
453 allowed to air dry on slides, followed by analysis on a confocal microscope (Zeiss LSM  
454 900 or Nikon A1R-MP).

455

### 456 **LacZ (β-galactosidase) staining**

457 Both *Scn2a<sup>gtKO/gtKO</sup>* and WT mice with or without AAV injection were processed at the  
458 same time under the same condition to minimize variation. Cryosections were fixed with  
459 2% formaldehyde + 0.2% glutaraldehyde in PBS for 5 min. Then sections were washed  
460 at least 5 min in PBS (with 0.02% Triton X-100 for optimal reduction of unspecific binding  
461 of antibodies). Tissues were covered with a volume of freshly prepared staining solution  
462 [X-Gal solution added into Iron Buffer (1/19, v/v) and mixed thoroughly for 10 min],  
463 sufficient to fully cover the specimen (e.g., 50 µL) and incubate for 15-30 min at 37°C in  
464 a humid chamber until cells were stained blue. Color development was checked under a  
465 microscope and incubation time was continued if necessary. Specimen were washed  
466 three times with PBS and mounted in glycerol before storage after removing PBS. Images  
467 were analyzed under an upright light microscope.

468

### 469 **Immunostaining and imaging analysis**

470 Cryosections (20 µm in thickness) were permeabilized, incubated in blocking buffer (0.5%  
471 Triton X-100 and 5% normal goat serum in PBS) for one hour at room temperature, and  
472 overlaid with primary antibodies overnight at 4°C. Then, the corresponding Alexa Fluor  
473 488-, 594- or 647-conjugated secondary antibodies were applied. All stained sections  
474 were mounted with DAPI-containing mounting solution and sealed with glass coverslips.  
475 All immunofluorescence-labeled images were acquired using a confocal microscope (65).

476

### 477 **RNA sequencing**

478 **RNA extraction:** Four *Scn2a<sup>gtKO/gtKO</sup>* (HOM) and four WT littermate mice were  
479 used to extract RNA. Mice were given an overdose of anesthesia and transcardiacallly  
480 perfused with ice-cold PBS. Acute coronal brain slices containing cortex and striatum  
481 (300-µm in thickness) were cut using a vibratome (Leica VT1200S, Germany). Cortex  
482 and striatum were rapidly microdissected, immersed into liquid nitrogen, and stored at -  
483 80°C until use (same procedures for Western Blotting and qPCR). Based on the  
484 manufacturer's instructions, total RNAs were extracted with TRIzol reagent (Thermo  
485 Fisher Scientific, 15596018) from mouse cerebral tissues.

486 **Library preparation and sequencing:** Novogene prepared libraries using the  
487 TruSeq Stranded kit (Illumina, San Diego, CA) and RNA quality was assessed using an  
488 Agilent Nano RNA ChIP. Paired-end 150 bp reads were sequenced using the NovaSeq  
489 6000.

490 **Analysis:** Reads were quality trimmed and Illumina TruSeq adapter sequences  
491 were removed using Trimmomatic v.0.36 (66). A sliding window approach to trimming  
492 was performed, using a window size of 5 and a required average Phred (quality) score of



493 16. Bases falling below a Phred score of 10 at the start and end of reads were trimmed  
494 and reads shorter than 20 bases in length after trimming were removed. FastQC v. 0.11.7  
495 (67) was run to observe data quality before and after trimming/adaptor removal. STAR v.  
496 2.5.4b (68) was used to align reads to the Ensembl *Mus musculus* genome database  
497 version GRCm38.p6. The htseq-count script in HTSeq v.0.7.0 (69) was run to count the  
498 number of reads mapping to each gene. HTSeq used Biopython v.2.7.3 in the analysis.  
499 HTSeq was run utilizing the GTF file on “intersection-nonempty” mode. The HTSeq  
500 feature was set to “exon” and the attribute parameter was set to “gene\_id” and the --  
501 stranded=reverse option was set. The Bioconductor packages DESeq2 v.1.22.2 and  
502 edgeR 3.24.3 were used for differential expression analysis. Genes that were identified  
503 as differentially expressed in both packages were used as high confidence differentially  
504 expressed genes and were used in subsequent pathway analysis. The Benjamini-  
505 Hochberg false discovery rate correction was used to correct p-values for multiple testing.  
506 To improve power, low expression transcripts were filtered out of the data before  
507 performing differential expression analysis. The threshold chosen was to filter out all  
508 genes expressed at lower than 0.5 counts per million (CPM) in all samples combined.  
509 After filtering, 18,134 genes were remaining. The expression of genes between WT and  
510 HOM were deemed significant if the adjusted p-value < 0.05. The Bioconductor package  
511 biomaRt v. 2.38.0 was used to perform annotation of genes. ClusterProfiler v. 3.10.1 was  
512 used to perform pathway and gene ontology enrichment analysis.

513

#### 514 **Western blotting**

515 Brain tissues were homogenized in ice-cold RIPA lysis and extraction buffer (Thermo  
516 Fisher Scientific, 89901) supplemented with protease and phosphatase inhibitors  
517 (Thermo Fisher Scientific, A32953), sonicated, and cleared by centrifugation (10,000× g,  
518 10 min, at 4°C). Protein concentration in the supernatant was determined by (determined  
519 by Nanodrop, Thermo Scientific). Proteins in 1× sample buffer [62.5 mM Tris-HCl (pH  
520 6.8), 2% (w/v) SDS, 5% glycerol, 0.05% (w/v) bromophenol blue] were denatured by  
521 boiling at 95°C for 5 min. For each sample, 40 µg total proteins were loaded to the 8%  
522 sodium dodecyl sulfate-polyacrylamide (SDS-PAGE) gels and transferred onto PVDF  
523 membrane (Millipore, IPFL00010) by electrophoresis. Blots were blocked in 5% nonfat  
524 milk in Tris-buffered saline and Tween 20 (TBST) for 1 h at room temperature and probed  
525 with the primary antibody in 5% milk-TBST overnight at 4°C. After overnight incubation,  
526 the blots were washed three times in TBST for 15 min, followed by incubation with  
527 corresponding IRDye® 680RD secondary antibodies in TBST for 2h at room temperature.  
528 Following three cycles of 15 min washes with TBST, the immunoreactive bands were  
529 scanned and captured by the Odyssey® CLx Imaging System (LI-COR Biosciences) and  
530 quantitatively analyzed by densitometry with Image Studio Lite 5.2 (LI-COR Biosciences)  
531 or ImageJ software (NIH). Each sample was normalized to its β-actin or GAPDH, then  
532 normalized with the corresponding WT littermates.

533

#### 534 **RNA isolation, reverse transcription, and qPCR analysis**

535 Total RNAs were extracted with TRIzol reagent (Thermo Fisher Scientific, 15596018)  
536 from mouse cerebral tissues according to the manufacturer’s instructions. 4 µg RNA was



537 subjected to reverse transcription (RT) with a Maxima First Strand cDNA Synthesis Kit  
538 (Thermo Fisher Scientific, K1672). The resulting cDNAs were subjected to quantitative  
539 PCR analysis using the PowerUp™ SYBR™ Green Master Mix (Thermo Fisher Scientific,  
540 A25777) and specific primers in a C1000 Touch PCR thermal cycler (Bio-Rad). *Gapdh*  
541 and *β-actin* mRNA levels were used as an endogenous control for normalization using  
542 the  $\Delta C_t$  method (70). In brief, test (T):  $\Delta C_t^T = [C_t^T (\text{target gene}) - C_t^T (\text{internal control})]$ ;  
543 Amount of the target =  $2^{-\Delta C_t}$ .

544

## 545 Patch-clamp recordings

546 **Acute slice preparations:** Electrophysiology was performed in slices prepared  
547 from 2-5 months-old *Scn2a<sup>gtKO/gtKO</sup>* and corresponding control mice. Mice were deeply  
548 anesthetized with ketamine/xylazine (100/10 mg/kg, i.p., 0.1 mL per 10 grams of body  
549 weight), and then transcardially perfused, and decapitated to dissect brains into ice-cold  
550 slicing solution containing the following (in mM): 110 choline chloride, 2.5 KCl, 1.25  
551  $\text{NaH}_2\text{PO}_4$ , 25  $\text{NaHCO}_3$ , 0.5  $\text{CaCl}_2$ , 7  $\text{MgCl}_2$ , 25 glucose, 0.6 sodium ascorbate, 3.1 sodium  
552 pyruvate (bubbled with 95%  $\text{O}_2$  and 5%  $\text{CO}_2$ , pH 7.4, 305-315 mOsm). Acute coronal  
553 slices containing PFC and/or striatum (300- $\mu\text{m}$  in thickness) were cut by using a  
554 vibratome (Leica VT1200S, Germany) and transferred to normal artificial cerebrospinal  
555 fluid (aCSF) (in mM): 125 NaCl, 2.5 KCl, 2.0  $\text{CaCl}_2$ , 2.0  $\text{MgCl}_2$ , 25  $\text{NaHCO}_3$ , 1.25  
556  $\text{NaH}_2\text{PO}_4$ , 10 glucose (bubbled with 95%  $\text{O}_2$  and 5%  $\text{CO}_2$ , pH 7.4, 305-315 mOsm). Then,  
557 slices were incubated at 37°C for 20-30 minutes and stored at room temperature before  
558 use. Slices were visualized under IR-DIC (infrared-differential interference contrast) using  
559 a BX-51WI microscope (Olympus) with an IR-2000 camera (Dage-MTI).

560 **Ex vivo electrophysiological whole-cell recordings:** All somatic whole-cell  
561 patch-clamp recordings were performed from identified striatal MSNs or mPFC layer V  
562 pyramidal neurons. The selection criteria for MSNs were based on morphological  
563 characteristics with medium-sized cell body presenting polygon or diamond viewed with  
564 a microscope equipped with IR-DIC optics (BX-51WI, Olympus), and numerous dendritic  
565 spines and their hyperpolarized RMP (lower than -80 mV) based on published method  
566 (71). Layer V pyramidal cells with a prominent apical dendrite were visually identified  
567 mainly by location, shape, and pClampex online membrane test parameters. Putative  
568 pyramidal cells in layer 5b were identified based on regular spiking characteristics (20,  
569 72, 73). To minimize variability, recordings were made on cells with low or high HCN  
570 expression levels, corresponding to intratelencephalic (IT) or pyramidal tract (PT) neurons,  
571 respectively. The selection criterion for PT pyramidal cells was based on their firing  
572 properties and shape of the AP (i.e., all cells' intrinsic ability to generate, upon  
573 subthreshold depolarization possessed a prominent after-hyperpolarization and  
574 significant membrane-potential sags induced by both hyperpolarizing and depolarizing  
575 current injection at the soma). Recordings of PT neurons were used for further analysis.

576 For whole-cell current-clamp recordings, the internal solution contained (in mM):  
577 122  $\text{KMeSO}_4$ , 4 KCl, 2  $\text{MgCl}_2$ , 0.2 EGTA, 10 HEPES, 4  $\text{Na}_2\text{ATP}$ , 0.3 Tris-GTP, 14 Tris-  
578 phosphocreatine, adjusted to pH 7.25 with KOH, 295-305 mOsm. The sag ratio, input  
579 resistance, and firing number were obtained in response to a series of 400 ms current  
580 steps from -200 pA to +400 pA in increments of 50 pA, each sweep duration of 5 s with

581 cells held at the normal RMP or a fixed potential of -80 mV. The sag ratio was calculated  
582 with the equation:

$$583 \quad \text{Sag ratio} = (V_{\text{baseline}} - V_{\text{steady-state}}) / (V_{\text{baseline}} - V_{\text{min}})$$

584 Where  $V_{\text{baseline}}$  is the resting membrane potential or -80 mV,  $V_{\text{min}}$  is the minimum  
585 voltage reached soon after the hyperpolarizing current pulse, and  $V_{\text{steady-state}}$  ( $V_{\text{ss}}$ ) is the  
586 voltage recorded at 0-10 ms before the end of the -200 pA stimulus.

587 The input resistance was calculated with the equation:

$$588 \quad \text{Input resistance} = (V_{\text{baseline}} - V_{\text{steady-state}}) * 10 \text{ (M}\Omega\text{)}$$

589 Where  $V_{\text{baseline}}$  is the resting membrane potential or -80 mV, and  $V_{\text{steady-state}}$  ( $V_{\text{ss}}$ ) is  
590 the voltage recorded at 0-10 ms before the end of the -100 pA stimulus.

591 The RMP, AP threshold, amplitude, fast afterhyperpolarization (fAHP), and half-  
592 width values were obtained in response to a 20 ms current step of the smallest current to  
593 obtain an intact AP, each sweep duration of 1.5 s and start-to-start intervals of 10 s with  
594 cells held at the normal RMP or a fixed potential of -80 mV. The RMP, AP threshold,  
595 amplitude, fAHP, and half-width values were analyzed using the Clampfit 11.1 inbuilt  
596 statistics measurements program (Criteria as the baseline, peak amplitude, antipeak  
597 amplitude, and half-width). The threshold was defined as the  $V_m$  when  $dV/dt$   
598 measurements first exceeded 15 V/s.

599 We used thin-wall borosilicate pipettes (BF150-110-10) with open-tip resistances  
600 of 3-5 M $\Omega$ . All recordings were started at least 1 min after breakin to stabilize the contact  
601 between the glass electrode and the cell membrane, and finished within 10 min to avoid  
602 large voltage changes due to the internal solution exchange equilibrium. Recordings were  
603 performed with an Axon MultiClamp 700B amplifier (Molecular Devices) and data were  
604 acquired using pClamp 11.1 software at the normal RMP or a fixed potential of -80 mV,  
605 filtered at 2 kHz and sampling rate at 20 kHz with an Axon Digidata 1550B plus  
606 HumSilencer digitizer (Molecular Devices). Slices were maintained under continuous  
607 perfusion of aCSF at 32-33°C with a 2-3 mL/min flow. In the whole-cell configuration  
608 series resistance ( $R_s$ ) 15-30 M $\Omega$ , and recordings with unstable  $R_s$  or a change of  $R_s$  >  
609 20% were aborted.

610 To study the effect of  $K_v$  channels openers, the 1000x stocks were freshly diluted  
611 with aCSF, respectively. After 10 min perfusion of each opener or the corresponding  
612 vehicle control (0.1% DMSO in aCSF for PiMA, and aCSF for 4TFMPG), the target  
613 neurons were studied with the continuous perfusion of the chemicals. One or two neurons  
614 were patched for each brain slice, and recordings were discarded if a slice was perfused  
615 with  $K_v$  channels openers for more than 30 min.

616 For cell labeling, the internal solution contains 0.1-0.2% (w/v) neurobiotin tracer.  
617 At the end of the electrophysiological recording (about 30 min), slices were treated as  
618 previously described (74). Briefly, sections were fixed in 4% paraformaldehyde in 0.1 M  
619 phosphate buffer (pH 7.4) for 20-30 min at room temperature, and subsequently washed  
620 3-4 times for 30 min in 0.1 M phosphate-buffered saline (PBS, pH 7.4) at 4°C. Sections  
621 were then incubated in Alexa 488-conjugated streptavidin (overnight at 4°C, 1: 250 in  
622 blocking solution) to visualize neurobiotin.

623

## 624 **Neuropixels recordings and data analysis**

625 **Surgeries:** Animal preparation was performed as described previously (64, 75).  
626 Mice were anesthetized and head-fixed and underwent stereotaxic surgery to implant a  
627 metal headframe with a 10-mm circular opening (Narishige, MAG-1, and CP2) for head-  
628 fixation. An incision was made over the skin. The skin and periosteum were removed,  
629 and a thin layer of cyanoacrylate (Krazy glue) was applied to attach the headplate and  
630 cover the exposed skull. A layer of clear Stoelting™ Dental Cement (Fisher Scientific, 10-  
631 000-786) was then applied on top of cyanoacrylate and forms a chamber around the skull  
632 to contain the ground wire and aCSF during electrophysiological recordings. The animals  
633 received two weeks recovery period after surgery before commencing experiments.  
634 Before electrophysiological recordings, a 600  $\mu\text{m}$  diameter craniotomy was prepared to  
635 access the intended brain regions with *Neuropixels* probes.

636 **In vivo recordings:** Electrophysiological recordings were made with *Neuropixels*  
637 probes in head-fixed mice. On the day of the experiment, the mouse was placed under  
638 light isoflurane anesthesia. A ground wire was secured to the skull, and the exposed brain  
639 was covered with a layer of 4% agar in aCSF. Following recovery from anesthesia, the  
640 mouse was head-fixed on the experimental rig. Before insertion, the probe tip was painted  
641 with CM-Dil. Briefly, the *Neuropixels* probe was secured to an arm of stereotaxic, and the  
642 backside of the probe was dipped into a 1  $\mu\text{L}$  droplet of CM-Dil (Thermo Fisher Scientific,  
643 C7000) dissolved in ethanol (1  $\mu\text{g}/\mu\text{L}$ ). The ethanol was allowed to evaporate, and the  
644 CM-Dil was dried onto the backside of the tip. The probe was then inserted slowly (120-  
645 480  $\mu\text{m}/\text{min}$ ) into the striatum (coordinates of the injection sites relative to bregma: AP  
646 +1.30 mm, ML  $\pm$ 1.25 mm, 4.50 mm in depth) through the craniotomy on the skull. After  
647 reaching the desired depth for a probe, the probe was allowed to settle for 10 minutes  
648 before the commencement of recording. The first 384 electrodes were turned on in the  
649 *Neuropixel* probe, which corresponds to about 3.8 mm length probe. At the end of each  
650 recording session, the probe was retracted out of the brain and cleaned using Tergazyme  
651 (Alconox) followed by washing with distilled water. The probe insertion was verified by  
652 identifying the Dil fluorescence in sectioned brain tissue.

653 **Data acquisition and Analysis:** All data were acquired with a 30-kHz sampling  
654 rate under the Open Ephys GUI (<https://open-ephys.atlassian.net/wiki/spaces/OEW/pages/963280903/Neuropix-PXI>). A 300-Hz high-  
655 pass filter was present in the *Neuropixels* probe, and another 300-Hz high-pass filter (3rd-  
656 order Butterworth) was applied offline before spike sorting.

658 Spike waveforms were automatically extracted from the raw data using Kilosort 2.0  
659 (<https://github.com/MouseLand/Kilosort/releases/tag/v2.0>). The outputs were loaded into  
660 PHY (76) for manual refinement, which consisted of merging and splitting clusters, as well  
661 as marking non-neural clusters as “noise”. Noise units were identified by their abnormal  
662 waveform shape, as well as distinct cyclical patterns in the autocorrelogram. A set of  
663 heuristic rules based on the features of waveforms to remove abnormal waveforms [the  
664 parameters were used for this purpose were peak-to-trough (PT) ratio < 0.99 and  
665 recovery slope < 0]. Waveforms for each unit were extracted from the raw data, and then  
666 averaged. All the averaged waveforms were used to calculate the mean waveform.

667 Striatal single units were classified according to the methods described previously  
668 (42), using mean firing rate, mean waveform peak width at half-maximum, mean  
669 waveform trough width at half-minimum, and ISI distribution. These values were averaged  
670 across epochs when a cell was present in multiple epochs. The standard classification  
671 for the clusters was defined as follows: fast-spiking interneurons (FSIs): firing rate > 3 Hz,  
672 peak width < 0.2 ms, and a ratio of trough width to peak width (TPR) < 2.7 (TPR was  
673 estimated by k-means clustering and was more reliable than exact trough width for FSIs);  
674 tonically-active neurons (TANs): < 5% of ISIs less than 10 ms, a median ISI > 100 ms,  
675 and peak width (0.2-0.35 ms) and trough width (0.1-0.2 ms) above the 95<sup>th</sup> percentile for  
676 the remainder of the units; unclassified units had low TPR and/or narrow trough widths (<  
677 0.3 ms) but firing rates < 2 Hz; all other units were considered putative medium spiny  
678 neurons (MSNs).

679

## 680 **Quantification and statistical analysis**

681 Normality and variance similarity was measured by GraphPad Prism before we applied  
682 any parametric tests. Two-tailed Student's *t*-test (parametric) or unpaired two-tailed  
683 Mann-Whitney U-test (non-parametric) was used for single comparisons between two  
684 groups. Other data were analyzed using one-way or two-way ANOVA with Tukey  
685 correction (parametric) or Kruskal-Wallis with Dunn's multi comparison correction (non-  
686 parametric) depending on the appropriate design. *Post hoc* comparisons were carried out  
687 only when the primary measure showed statistical significance. Error bars in all figures  
688 represent mean  $\pm$  SEM. *p* values less than 0.05 were considered statistically significant.  
689 Statistical significance of differences at *p* < 0.05 is indicated as one asterisk (\*), *p* < 0.01  
690 is indicated as two asterisks (\*\*), and *p* < 0.001 is indicated as three asterisks (\*\*\*) in all  
691 figures. Mice with different litters, body weights, and sexes were randomized and  
692 assigned to different treatment groups, and no other specific randomization was used for  
693 the animal studies.

694

## 695 **SUPPLEMENTARY MATERIALS**

696 Supplementary material for this article is available online at TBD.

697

## 698 **REFERENCES AND NOTES**

- 699 1. E. V. Gazina, B. T. Leaw, K. L. Richards, V. C. Wimmer, T. H. Kim, T. D. Aumann, T. J.  
700 Featherby, L. Churilov, V. E. Hammond, C. A. Reid, S. Petrou, 'Neonatal' Nav1.2  
701 reduces neuronal excitability and affects seizure susceptibility and behaviour. *Hum Mol*  
702 *Genet* **24**, 1457-1468 (2015).
- 703 2. S. J. Sanders, A. J. Campbell, J. R. Cottrell, R. S. Moller, F. F. Wagner, A. L. Aldridge,  
704 R. A. Bernier, W. A. Catterall, W. K. Chung, J. R. Empfield, A. L. George, Jr., J. F. Hipp,  
705 O. Khwaja, E. Kiskinis, D. Lal, D. Malhotra, J. J. Millichap, T. S. Otis, S. Petrou, G. Pitt,  
706 L. F. Schust, C. M. Taylor, J. Tjernagel, J. E. Spiro, K. J. Bender, Progress in  
707 Understanding and Treating SCN2A-Mediated Disorders. *Trends in neurosciences* **41**,  
708 442-456 (2018).
- 709 3. C. Tian, K. Wang, W. Ke, H. Guo, Y. Shu, Molecular identity of axonal sodium channels  
710 in human cortical pyramidal cells. *Front Cell Neurosci* **8**, 297 (2014).



- 711 4. H. Miyazaki, F. Oyama, R. Inoue, T. Aosaki, T. Abe, H. Kiyonari, Y. Kino, M. Kurosawa,  
712 J. Shimizu, I. Ogiwara, K. Yamakawa, Y. Koshimizu, F. Fujiyama, T. Kaneko, H.  
713 Shimizu, K. Nagatomo, K. Yamada, T. Shimogori, N. Hattori, M. Miura, N. Nukina,  
714 Singular localization of sodium channel beta4 subunit in unmyelinated fibres and its role  
715 in the striatum. *Nature communications* **5**, 5525 (2014).
- 716 5. T. Yamagata, I. Ogiwara, E. Mazaki, Y. Yanagawa, K. Yamakawa, Nav1.2 is expressed  
717 in caudal ganglionic eminence-derived disinhibitory interneurons: Mutually exclusive  
718 distributions of Nav1.1 and Nav1.2. *Biochemical and biophysical research*  
719 *communications* **491**, 1070-1076 (2017).
- 720 6. S. J. Sanders, M. T. Murtha, A. R. Gupta, J. D. Murdoch, M. J. Raubeson, A. J. Willsey,  
721 A. G. Ercan-Sencicek, N. M. DiLullo, N. N. Parikshak, J. L. Stein, M. F. Walker, G. T.  
722 Ober, N. A. Teran, Y. Song, P. El-Fishawy, R. C. Murtha, M. Choi, J. D. Overton, R. D.  
723 Bjornson, N. J. Carriero, K. A. Meyer, K. Bilguvar, S. M. Mane, N. Sestan, R. P. Lifton,  
724 M. Gunel, K. Roeder, D. H. Geschwind, B. Devlin, M. W. State, De novo mutations  
725 revealed by whole-exome sequencing are strongly associated with autism. *Nature* **485**,  
726 237-241 (2012).
- 727 7. A. Hoischen, N. Krumm, E. E. Eichler, Prioritization of neurodevelopmental disease  
728 genes by discovery of new mutations. *Nat Neurosci* **17**, 764-772 (2014).
- 729 8. M. R. Johnson, K. Shkura, S. R. Langley, A. Delahaye-Duriez, P. Srivastava, W. D. Hill,  
730 O. J. Rackham, G. Davies, S. E. Harris, A. Moreno-Moral, M. Rotival, D. Speed, S.  
731 Petrovski, A. Katz, C. Hayward, D. J. Porteous, B. H. Smith, S. Padmanabhan, L. J.  
732 Hocking, J. M. Starr, D. C. Liewald, A. Visconti, M. Falchi, L. Bottolo, T. Rossetti, B.  
733 Danis, M. Mazzuferi, P. Foerch, A. Grote, C. Helmstaedter, A. J. Becker, R. M.  
734 Kaminski, I. J. Deary, E. Petretto, Systems genetics identifies a convergent gene  
735 network for cognition and neurodevelopmental disease. *Nat Neurosci* **19**, 223-232  
736 (2016).
- 737 9. T. Wang, H. Guo, B. Xiong, H. A. Stessman, H. Wu, B. P. Coe, T. N. Turner, Y. Liu, W.  
738 Zhao, K. Hoekzema, L. Vives, L. Xia, M. Tang, J. Ou, B. Chen, Y. Shen, G. Xun, M.  
739 Long, J. Lin, Z. N. Kronenberg, Y. Peng, T. Bai, H. Li, X. Ke, Z. Hu, J. Zhao, X. Zou, K.  
740 Xia, E. E. Eichler, De novo genic mutations among a Chinese autism spectrum disorder  
741 cohort. *Nature communications* **7**, 13316 (2016).
- 742 10. F. K. Satterstrom, J. A. Kosmicki, J. Wang, M. S. Breen, S. De Rubeis, J. Y. An, M.  
743 Peng, R. Collins, J. Grove, L. Klei, C. Stevens, J. Reichert, M. S. Mulhern, M. Artomov,  
744 S. Gerges, B. Sheppard, X. Xu, A. Bhaduri, U. Norman, H. Brand, G. Schwartz, R.  
745 Nguyen, E. E. Guerrero, C. Dias, C. Autism Sequencing, P.-B. C. i, C. Betancur, E. H.  
746 Cook, L. Gallagher, M. Gill, J. S. Sutcliffe, A. Thurm, M. E. Zwick, A. D. Borglum, M. W.  
747 State, A. E. Cicek, M. E. Talkowski, D. J. Cutler, B. Devlin, S. J. Sanders, K. Roeder, M.  
748 J. Daly, J. D. Buxbaum, Large-Scale Exome Sequencing Study Implicates Both  
749 Developmental and Functional Changes in the Neurobiology of Autism. *Cell* **180**, 568-  
750 584 e523 (2020).
- 751 11. M. Wolff, K. M. Johannesen, U. B. S. Hedrich, S. Masnada, G. Rubboli, E. Gardella, G.  
752 Lesca, D. Ville, M. Milh, L. Villard, A. Afenjar, S. Chantot-Bastaraud, C. Mignot, C.  
753 Lardenois, C. Nava, N. Schwarz, M. Gerard, L. Perrin, D. Doummar, S. Auvin, M. J.  
754 Miranda, M. Hempel, E. Brilstra, N. Knoers, N. Verbeek, M. van Kempen, K. P. Braun,  
755 G. Mancini, S. Biskup, K. Hortnagel, M. Docker, T. Bast, T. Loddenkemper, L. Wong-  
756 Kisiel, F. M. Baumeister, W. Fazeli, P. Striano, R. Dilena, E. Fontana, F. Zara, G.  
757 Kurlemann, J. Klepper, J. G. Thoene, D. H. Arndt, N. Deconinck, T. Schmitt-Mechelke,  
758 O. Maier, H. Muhle, B. Wical, C. Finetti, R. Bruckner, J. Pietz, G. Golla, D. Jillella, K. M.  
759 Linnet, P. Charles, U. Moog, E. Oiglane-Shlik, J. F. Mantovani, K. Park, M. Deprez, D.  
760 Lederer, S. Mary, E. Scalais, L. Selim, R. Van Coster, L. Lagae, M. Nikanorova, H.  
761 Hjalgrim, G. C. Korenke, M. Trivisano, N. Specchio, B. Ceulemans, T. Dorn, K. L. Helbig,



- 762 K. Hardies, H. Stamberger, P. de Jonghe, S. Weckhuysen, J. R. Lemke, I. Krageloh-  
763 Mann, I. Helbig, G. Kluger, H. Lerche, R. S. Moller, Genetic and phenotypic  
764 heterogeneity suggest therapeutic implications in SCN2A-related disorders. *Brain : a*  
765 *journal of neurology* **140**, 1316-1336 (2017).
- 766 12. M. Wolff, A. Brunklaus, S. M. Zuberi, Phenotypic spectrum and genetics of SCN2A-  
767 related disorders, treatment options, and outcomes in epilepsy and beyond. *Epilepsia* **60**  
768 **Suppl 3**, S59-S67 (2019).
- 769 13. K. Tóth, K. T. Hofer, Á. Kandrács, L. Entz, A. Bagó, L. Eröss, Z. Jordán, G. Nagy, A.  
770 Sólyom, D. Fabó, I. Ulbert, L. Wittner, Hyperexcitability of the network contributes to  
771 synchronization processes in the human epileptic neocortex. *The Journal of physiology*  
772 **596**, 317-342 (2018).
- 773 14. R. Planells-Cases, M. Caprini, J. Zhang, E. M. Rockenstein, R. R. Rivera, C. Murre, E.  
774 Masliah, M. Montal, Neuronal death and perinatal lethality in voltage-gated sodium  
775 channel alpha(II)-deficient mice. *Biophys J* **78**, 2878-2891 (2000).
- 776 15. W. Shin, H. Kweon, R. Kang, D. Kim, K. Kim, M. Kang, S. Y. Kim, S. N. Hwang, J. Y.  
777 Kim, E. Yang, H. Kim, E. Kim, Scn2a Haploinsufficiency in Mice Suppresses  
778 Hippocampal Neuronal Excitability, Excitatory Synaptic Drive, and Long-Term  
779 Potentiation, and Spatial Learning and Memory. *Frontiers in Molecular Neuroscience* **12**,  
780 (2019).
- 781 16. I. Ogiwara, H. Miyamoto, T. Tatsukawa, T. Yamagata, T. Nakayama, N. Atapour, E.  
782 Miura, E. Mazaki, S. J. Ernst, D. Cao, H. Ohtani, S. Itohara, Y. Yanagawa, M. Montal, M.  
783 Yuzaki, Y. Inoue, T. K. Hensch, J. L. Noebels, K. Yamakawa, Nav1.2 haplodeficiency in  
784 excitatory neurons causes absence-like seizures in mice. *Commun Biol* **1**, 96 (2018).
- 785 17. H. Miyamoto, T. Tatsukawa, A. Shimohata, T. Yamagata, T. Suzuki, K. Amano, E.  
786 Mazaki, M. Raveau, I. Ogiwara, A. Oba-Asaka, T. K. Hensch, S. Itohara, K. Sakimura, K.  
787 Kobayashi, K. Kobayashi, K. Yamakawa, Impaired cortico-striatal excitatory transmission  
788 triggers epilepsy. *Nature communications* **10**, 1917 (2019).
- 789 18. M. V. Fuccillo, Striatal Circuits as a Common Node for Autism Pathophysiology. *Front*  
790 *Neurosci* **10**, 27 (2016).
- 791 19. J. Aupy, F. Wendling, K. Taylor, J. Bulacio, J. Gonzalez-Martinez, P. Chauvel, Cortico-  
792 striatal synchronization in human focal seizures. *Brain : a journal of neurology* **142**,  
793 1282-1295 (2019).
- 794 20. P. W. E. Spratt, R. Ben-Shalom, C. M. Keeshen, K. J. Burke, Jr., R. L. Clarkson, S. J.  
795 Sanders, K. J. Bender, The Autism-Associated Gene Scn2a Contributes to Dendritic  
796 Excitability and Synaptic Function in the Prefrontal Cortex. *Neuron* **103**, 673-685 e675  
797 (2019).
- 798 21. M. S. Fallah, J. H. Eubanks, Seizures in Mouse Models of Rare Neurodevelopmental  
799 Disorders. *Neuroscience* **445**, 50-68 (2020).
- 800 22. M. Eaton, J. Zhang, Z. Ma, A. C. Park, E. Lietzke, C. M. Romero, Y. Liu, E. R. Coleman,  
801 X. Chen, T. Xiao, Z. Que, S. Lai, J. Wu, J. H. Lee, S. Palant, H. P. Nguyen, Z. Huang,  
802 W. C. Skarnes, W. A. Koss, Y. Yang, Generation and basic characterization of a gene-  
803 trap knockout mouse model of Scn2a with a substantial reduction of voltage-gated  
804 sodium channel Nav 1.2 expression. *Genes Brain Behav*, e12725 (2020).
- 805 23. W. C. Skarnes, H. von Melchner, W. Wurst, G. Hicks, A. S. Nord, T. Cox, S. G. Young,  
806 P. Ruiz, P. Soriano, M. Tessier-Lavigne, B. R. Conklin, W. L. Stanford, J. Rossant, C.  
807 International Gene Trap, A public gene trap resource for mouse functional genomics.  
808 *Nat Genet* **36**, 543-544 (2004).
- 809 24. W. C. Skarnes, B. Rosen, A. P. West, M. Koutsourakis, W. Bushell, V. Iyer, A. O. Mujica,  
810 M. Thomas, J. Harrow, T. Cox, D. Jackson, J. Severin, P. Biggs, J. Fu, M. Nefedov, P. J.  
811 de Jong, A. F. Stewart, A. Bradley, A conditional knockout resource for the genome-wide  
812 study of mouse gene function. *Nature* **474**, 337-342 (2011).

- 813 25. W. Hu, B. P. Bean, Differential Control of Axonal and Somatic Resting Potential by  
814 Voltage-Dependent Conductances in Cortical Layer 5 Pyramidal Neurons. *Neuron* **99**,  
815 1355 (2018).
- 816 26. Z. Huang, M. C. Walker, M. M. Shah, Loss of dendritic HCN1 subunits enhances cortical  
817 excitability and epileptogenesis. *The Journal of neuroscience : the official journal of the*  
818 *Society for Neuroscience* **29**, 10979-10988 (2009).
- 819 27. G. Testa, J. Schaft, F. van der Hoeven, S. Glaser, K. Anastassiadis, Y. Zhang, T.  
820 Hermann, W. Stremmel, A. F. Stewart, A reliable lacZ expression reporter cassette for  
821 multipurpose, knockout-first alleles. *Genesis* **38**, 151-158 (2004).
- 822 28. K. Y. Chan, M. J. Jang, B. B. Yoo, A. Greenbaum, N. Ravi, W. L. Wu, L. Sanchez-  
823 Guardado, C. Lois, S. K. Mazmanian, B. E. Deverman, V. Gradinaru, Engineered AAVs  
824 for efficient noninvasive gene delivery to the central and peripheral nervous systems.  
825 *Nature neuroscience* **20**, 1172-1179 (2017).
- 826 29. M. H. Meisler, SCN8A encephalopathy: Mechanisms and models. *Epilepsia* **60 Suppl 3**,  
827 S86-S91 (2019).
- 828 30. R. K. A. Bunton-Stasyshyn, J. L. Wagnon, E. R. Wengert, B. S. Barker, A. Faulkner, P.  
829 K. Wagley, K. Bhatia, J. M. Jones, M. R. Maniaci, J. M. Parent, H. P. Goodkin, M. K.  
830 Patel, M. H. Meisler, Prominent role of forebrain excitatory neurons in SCN8A  
831 encephalopathy. *Brain : a journal of neurology* **142**, 362-375 (2019).
- 832 31. L. F. Lopez-Santiago, Y. Yuan, J. L. Wagnon, J. M. Hull, C. R. Frasier, H. A. O'Malley,  
833 M. H. Meisler, L. L. Isom, Neuronal hyperexcitability in a mouse model of SCN8A  
834 epileptic encephalopathy. *Proc Natl Acad Sci U S A* **114**, 2383-2388 (2017).
- 835 32. C. D. Makinson, B. S. Tanaka, J. M. Sorokin, J. C. Wong, C. A. Christian, A. L. Goldin,  
836 A. Escayg, J. R. Huguenard, Regulation of Thalamic and Cortical Network Synchrony by  
837 Scn8a. *Neuron* **93**, 1165-1179 e1166 (2017).
- 838 33. A. V. Vega, D. L. Henry, G. Matthews, Reduced expression of Na(v)1.6 sodium channels  
839 and compensation by Na(v)1.2 channels in mice heterozygous for a null mutation in  
840 Scn8a. *Neurosci Lett* **442**, 69-73 (2008).
- 841 34. E. Katz, O. Stoler, A. Scheller, Y. Khrapunsky, S. Goebbels, F. Kirchhoff, M. J. Gutnick,  
842 F. Wolf, I. A. Fleidervish, Role of sodium channel subtype in action potential generation  
843 by neocortical pyramidal neurons. *Proceedings of the National Academy of Sciences of*  
844 *the United States of America* **115**, E7184-E7192 (2018).
- 845 35. D. Guan, J. C. Lee, T. Tkatch, D. J. Surmeier, W. E. Armstrong, R. C. Foehring,  
846 Expression and biophysical properties of Kv1 channels in supragranular neocortical  
847 pyramidal neurones. *The Journal of physiology* **571**, 371-389 (2006).
- 848 36. Z. Niday, A. V. Tzingounis, Potassium Channel Gain of Function in Epilepsy: An  
849 Unresolved Paradox. *The Neuroscientist : a review journal bringing neurobiology,*  
850 *neurology and psychiatry* **24**, 368-380 (2018).
- 851 37. A. Lorincz, Z. Nusser, Cell-type-dependent molecular composition of the axon initial  
852 segment. *The Journal of neuroscience : the official journal of the Society for*  
853 *Neuroscience* **28**, 14329-14340 (2008).
- 854 38. M. Dumenieu, M. Oule, M. R. Kreutz, J. Lopez-Rojas, The Segregated Expression of  
855 Voltage-Gated Potassium and Sodium Channels in Neuronal Membranes: Functional  
856 Implications and Regulatory Mechanisms. *Front Cell Neurosci* **11**, 115 (2017).
- 857 39. K. Trosclair, H. A. Dhaibar, N. M. Gautier, V. Mishra, E. Glasscock, Neuron-specific  
858 Kv1.1 deficiency is sufficient to cause epilepsy, premature death, and cardiorespiratory  
859 dysregulation. *Neurobiology of disease* **137**, 104759 (2020).
- 860 40. K. Sakamoto, Y. Suzuki, H. Yamamura, S. Ohya, K. Muraki, Y. Imaizumi, Molecular  
861 mechanisms underlying pimaric acid-induced modulation of voltage-gated K(+)   
862 channels. *J Pharmacol Sci* **133**, 223-231 (2017).

- 863 41. R. W. Manville, G. W. Abbott, Isoform-Selective KCNA1 Potassium Channel Openers  
864 Built from Glycine. *J Pharmacol Exp Ther* **373**, 391-401 (2020).
- 865 42. M. Sosa, H. R. Joo, L. M. Frank, Dorsal and Ventral Hippocampal Sharp-Wave Ripples  
866 Activate Distinct Nucleus Accumbens Networks. *Neuron* **105**, 725-741.e728 (2020).
- 867 43. M. W. Antoine, T. Langberg, P. Schnepel, D. E. Feldman, Increased Excitation-Inhibition  
868 Ratio Stabilizes Synapse and Circuit Excitability in Four Autism Mouse Models. *Neuron*  
869 **101**, 648-661.e644 (2019).
- 870 44. R. E. Westenbroek, J. L. Noebels, W. A. Catterall, Elevated expression of type II Na<sup>+</sup>  
871 channels in hypomyelinated axons of shiverer mouse brain. *J Neurosci* **12**, 2259-2267  
872 (1992).
- 873 45. J. Wang, S. W. Ou, Y. J. Wang, Distribution and function of voltage-gated sodium  
874 channels in the nervous system. *Channels (Austin)* **11**, 534-554 (2017).
- 875 46. A. M. Rush, S. D. Dib-Hajj, S. G. Waxman, Electrophysiological properties of two axonal  
876 sodium channels, Nav1.2 and Nav1.6, expressed in mouse spinal sensory neurones.  
877 *The Journal of physiology* **564**, 803-815 (2005).
- 878 47. W. Hu, C. Tian, T. Li, M. Yang, H. Hou, Y. Shu, Distinct contributions of Na(v)1.6 and  
879 Na(v)1.2 in action potential initiation and backpropagation. *Nat Neurosci* **12**, 996-1002  
880 (2009).
- 881 48. A. D. Workman, C. J. Charvet, B. Clancy, R. B. Darlington, B. L. Finlay, Modeling  
882 transformations of neurodevelopmental sequences across mammalian species. *The*  
883 *Journal of neuroscience : the official journal of the Society for Neuroscience* **33**, 7368-  
884 7383 (2013).
- 885 49. E. V. Gazina, K. L. Richards, M. B. Mokhtar, E. A. Thomas, C. A. Reid, S. Petrou,  
886 Differential expression of exon 5 splice variants of sodium channel alpha subunit mRNAs  
887 in the developing mouse brain. *Neuroscience* **166**, 195-200 (2010).
- 888 50. K. J. Bender, L. O. Trussell, The physiology of the axon initial segment. *Annual review of*  
889 *neuroscience* **35**, 249-265 (2012).
- 890 51. U. B. S. Hedrich, S. Lauxmann, H. Lerche, SCN2A channelopathies: Mechanisms and  
891 models. *Epilepsia* **60 Suppl 3**, S68-S76 (2019).
- 892 52. R. Ben-Shalom, C. M. Keeshen, K. N. Berrios, J. Y. An, S. J. Sanders, K. J. Bender,  
893 Opposing Effects on NaV1.2 Function Underlie Differences Between SCN2A Variants  
894 Observed in Individuals With Autism Spectrum Disorder or Infantile Seizures. *Biol*  
895 *Psychiatry* **82**, 224-232 (2017).
- 896 53. I. H. Quraishi, S. Stern, K. P. Mangan, Y. Zhang, S. R. Ali, M. R. Mercier, M. C.  
897 Marchetto, M. J. McLachlan, E. M. Jones, F. H. Gage, L. K. Kaczmarek, An Epilepsy-  
898 Associated KCNT1 Mutation Enhances Excitability of Human iPSC-Derived Neurons by  
899 Increasing Slack KNa Currents. *The Journal of neuroscience : the official journal of the*  
900 *Society for Neuroscience* **39**, 7438-7449 (2019).
- 901 54. H. Soh, S. Park, K. Ryan, K. Springer, A. Maheshwari, A. V. Tzingounis, Deletion of  
902 KCNQ2/3 potassium channels from PV<sup>+</sup> interneurons leads to homeostatic potentiation  
903 of excitatory transmission. *eLife* **7**, (2018).
- 904 55. Z. Niday, V. E. Hawkins, H. Soh, D. K. Mulkey, A. V. Tzingounis, Epilepsy-Associated  
905 KCNQ2 Channels Regulate Multiple Intrinsic Properties of Layer 2/3 Pyramidal Neurons.  
906 *The Journal of neuroscience : the official journal of the Society for Neuroscience* **37**,  
907 576-586 (2017).
- 908 56. J. J. Millichap, K. L. Park, T. Tsuchida, B. Ben-Zeev, L. Carmant, R. Flamini, N. Joshi, P.  
909 M. Levisohn, E. Marsh, S. Nangia, V. Narayanan, X. R. Ortiz-Gonzalez, M. C. Patterson,  
910 P. L. Pearl, B. Porter, K. Ramsey, E. L. McGinnis, M. Tagliatela, M. Tracy, B. Tran, C.  
911 Venkatesan, S. Weckhuysen, E. C. Cooper, KCNQ2 encephalopathy: Features,  
912 mutational hot spots, and ezogabine treatment of 11 patients. *Neurology. Genetics* **2**,  
913 e96 (2016).

- 914 57. I. H. Quraishi, M. R. Mercier, H. McClure, R. L. Couture, M. L. Schwartz, R. Lukowski, P.  
915 Ruth, L. K. Kaczmarek, Impaired motor skill learning and altered seizure susceptibility in  
916 mice with loss or gain of function of the *Kcnt1* gene encoding Slack (KNa1.1) Na(+)-  
917 activated K(+) channels. *Sci Rep* **10**, 3213 (2020).
- 918 58. J. Johnston, I. D. Forsythe, C. Kopp-Scheinpflug, SYMPOSIUM REVIEW: Going native:  
919 voltage-gated potassium channels controlling neuronal excitability. *The Journal of*  
920 *physiology* **588**, 3187-3200 (2010).
- 921 59. H. Wulff, N. A. Castle, L. A. Pardo, Voltage-gated potassium channels as therapeutic  
922 targets. *Nature Reviews Drug Discovery* **8**, 982-1001 (2009).
- 923 60. R. C. Wykes, J. H. Heeroma, L. Mantoan, K. Zheng, D. C. MacDonald, K. Deisseroth, K.  
924 S. Hashemi, M. C. Walker, S. Schorge, D. M. Kullmann, Optogenetic and potassium  
925 channel gene therapy in a rodent model of focal neocortical epilepsy. *Sci Transl Med* **4**,  
926 161ra152 (2012).
- 927 61. A. Snowball, E. Chabrol, R. C. Wykes, T. Shekh-Ahmad, J. H. Cornford, A. Lieb, M. P.  
928 Hughes, G. Massaro, A. A. Rahim, K. S. Hashemi, D. M. Kullmann, M. C. Walker, S.  
929 Schorge, Epilepsy Gene Therapy Using an Engineered Potassium Channel. *The Journal*  
930 *of neuroscience : the official journal of the Society for Neuroscience* **39**, 3159-3169  
931 (2019).
- 932 62. A. T. Berg, H. Palac, G. Wilkening, F. Zelko, L. Schust Meyer, SCN2A-Developmental  
933 and Epileptic Encephalopathies: Challenges to trial-readiness for non-seizure outcomes.  
934 *Epilepsia*, (2020).
- 935 63. L. E. Fenno, J. Mattis, C. Ramakrishnan, M. Hyun, S. Y. Lee, M. He, J. Tucciarone, A.  
936 Selimbeyoglu, A. Berndt, L. Grosenick, K. A. Zalocusky, H. Bernstein, H. Swanson, C.  
937 Perry, I. Diester, F. M. Boyce, C. E. Bass, R. Neve, Z. J. Huang, K. Deisseroth,  
938 Targeting cells with single vectors using multiple-feature Boolean logic. *Nat Methods* **11**,  
939 763-772 (2014).
- 940 64. L. D. Liu, S. Chen, M. N. Economo, N. Li, K. Svoboda, Accurate localization of linear  
941 probe electrodes across multiple brains. *bioRxiv*, 2020.2002.2025.965210 (2020).
- 942 65. J. Wang, X. He, H. Meng, Y. Li, P. Dmitriev, F. Tian, J. C. Page, Q. R. Lu, Z. He, Robust  
943 Myelination of Regenerated Axons Induced by Combined Manipulations of GPR17 and  
944 Microglia. *Neuron* **108**, 876-886.e874 (2020).
- 945 66. A. M. Bolger, M. Lohse, B. Usadel, Trimmomatic: a flexible trimmer for Illumina  
946 sequence data. *Bioinformatics* **30**, 2114-2120 (2014).
- 947 67. S. Andrews, FastQC. (2010).
- 948 68. A. Dobin, C. A. Davis, F. Schlesinger, J. Drenkow, C. Zaleski, S. Jha, P. Batut, M.  
949 Chaisson, T. R. Gingeras, STAR: ultrafast universal RNA-seq aligner. *Bioinformatics* **29**,  
950 15-21 (2013).
- 951 69. S. Anders, P. T. Pyl, W. Huber, HTSeq--a Python framework to work with high-  
952 throughput sequencing data. *Bioinformatics* **31**, 166-169 (2015).
- 953 70. K. J. Livak, T. D. Schmittgen, Analysis of relative gene expression data using real-time  
954 quantitative PCR and the 2(-Delta Delta C(T)) Method. *Methods* **25**, 402-408 (2001).
- 955 71. M. E. Torres-Garcia, O. Solis, A. Patricio, A. Rodriguez-Moreno, I. Camacho-Abrego, I.  
956 D. Limon, G. Flores, Dendritic morphology changes in neurons from the prefrontal  
957 cortex, hippocampus and nucleus accumbens in rats after lesion of the thalamic reticular  
958 nucleus. *Neuroscience* **223**, 429-438 (2012).
- 959 72. R. L. Clarkson, A. T. Liptak, S. M. Gee, V. S. Sohal, K. J. Bender, D3 Receptors  
960 Regulate Excitability in a Unique Class of Prefrontal Pyramidal Cells. *The Journal of*  
961 *Neuroscience* **37**, 5846-5860 (2017).
- 962 73. N. C. Dembrow, R. A. Chitwood, D. Johnston, Projection-Specific Neuromodulation of  
963 Medial Prefrontal Cortex Neurons. *The Journal of Neuroscience* **30**, 16922-16937  
964 (2010).



- 965 74. M. J. Fogarty, L. A. Hammond, R. Kanjhan, M. C. Bellingham, P. G. Noakes, A method  
966 for the three-dimensional reconstruction of Neurobiotin-filled neurons and the location of  
967 their synaptic inputs. *Frontiers in neural circuits* **7**, 153 (2013).
- 968 75. X. Jia, J. H. Siegle, C. Bennett, S. D. Gale, D. J. Denman, C. Koch, S. R. Olsen, High-  
969 density extracellular probes reveal dendritic backpropagation and facilitate neuron  
970 classification. *Journal of neurophysiology* **121**, 1831-1847 (2019).
- 971 76. J. H. Siegle, X. Jia, S. Durand, S. Gale, C. Bennett, N. Graddis, G. Heller, T. K. Ramirez,  
972 H. Choi, J. A. Luviano, P. A. Groblewski, R. Ahmed, A. Arkhipov, A. Bernard, Y. N.  
973 Billeh, D. Brown, M. A. Buice, N. Cain, S. Caldejon, L. Casal, A. Cho, M. Chvilicek, T. C.  
974 Cox, K. Dai, D. J. Denman, S. E. J. de Vries, R. Dietzman, L. Esposito, C. Farrell, D.  
975 Feng, J. Galbraith, M. Garrett, E. C. Gelfand, N. Hancock, J. A. Harris, R. Howard, B.  
976 Hu, R. Hytnen, R. Iyer, E. Jessett, K. Johnson, I. Kato, J. Kiggins, S. Lambert, J. Lecoq,  
977 P. Ledochowitsch, J. H. Lee, A. Leon, Y. Li, E. Liang, F. Long, K. Mace, J. Melchior, D.  
978 Millman, T. Mollenkopf, C. Nayan, L. Ng, K. Ngo, T. Nguyen, P. R. Nicovich, K. North, G.  
979 K. Ocker, D. Ollerenshaw, M. Oliver, M. Pachitariu, J. Perkins, M. Reding, D. Reid, M.  
980 Robertson, K. Ronellenfitch, S. Seid, C. Slaughterbeck, M. Stoecklin, D. Sullivan, B.  
981 Sutton, J. Swapp, C. Thompson, K. Turner, W. Wakeman, J. D. Whitesell, D. Williams,  
982 A. Williford, R. Young, H. Zeng, S. Naylor, J. W. Phillips, R. C. Reid, S. Mihalas, S. R.  
983 Olsen, C. Koch, A survey of spiking activity reveals a functional hierarchy of mouse  
984 corticothalamic visual areas. *bioRxiv*, 805010 (2019).

985

## 986 ACKNOWLEDGMENTS

987 **General:** We thank Dr. Amy Brewster and Dr. Chongli Yuan for the critical reading of this  
988 paper.

989

990 **Funding:** This work is supported by Purdue startup funding, Ralph W. and Grace M.  
991 Showalter Research Trust, and Purdue Big Idea Challenge 2.0 on Autism to Y.Y. The  
992 authors gratefully acknowledge support from the Purdue University Institute for Drug  
993 Discovery and Institute for Integrative Neuroscience. M.E. is supported by the National  
994 Science Foundation (NSF) Graduate Research Fellowship Program (GRFP) (DGE-  
995 1842166). Yang lab is grateful to the *FamilieSCN2A* foundation for the Action Potential  
996 Grant support. This project was funded, in part, with support from the Indiana Clinical and  
997 Translational Sciences Institute funded, in part by Award Number UL1TR002529 from the  
998 National Institutes of Health, National Center for Advancing Translational Sciences,  
999 Clinical and Translational Sciences Award. The Yang lab appreciates the bioinformatics  
1000 support of the Collaborative Core for Cancer Bioinformatics (C<sup>3</sup>B) with support from the  
1001 Indiana University Simon Comprehensive Cancer Center (Grant P30CA082709), Purdue  
1002 University Center for Cancer Research (Grant P30CA023168), and Walther Cancer  
1003 Foundation. The content is solely the responsibility of the authors and does not  
1004 necessarily represent the official views of the National Institutes of Health.

1005

1006 **Author contributions:** J.Z., X.C., Y.Y. designed the experiments. J.Z., X.C., M.E., S.L.,  
1007 A.P., T.S.A., J.W., Z.M., Z.Q., J.L., T.X., Y.L., Y.W., M.I.O.A., N.A.L. performed the  
1008 experiments and analyzed the data. J.A.S, K.J., Z.H., N.A.L., W.C.S. participate in data



1009 analysis and experimental design. Y.Y. supervised the project. J.Z. and Y.Y. wrote the  
1010 paper with inputs from all authors.

1011

1012 **Competing interests:** The authors declare no competing interests.

1013

1014 **Data and materials availability:** Additional results can be found in the supplemental  
1015 material. The data that supports the findings of this study are available from the  
1016 corresponding author upon reasonable request.

1017

1018 **FIGURE LEGEND**

1019 **Figure 1**

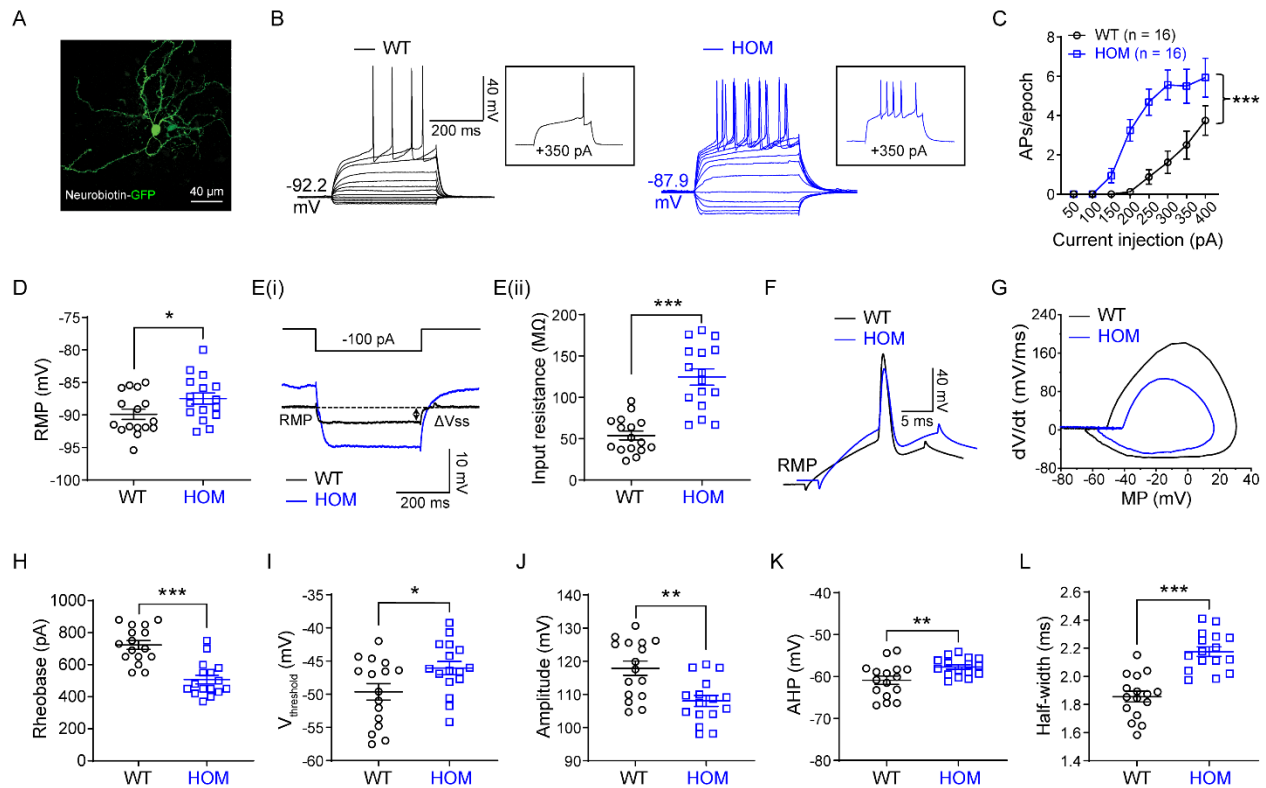

1020  
1021 **Fig. 1. Elevated neuronal firings of striatal medium spiny neurons (MSNs) in adult Nav1.2-**  
1022 **deficient mice.**

1023 (A) A typical MSN labeled by neurobiotin. Scale bar, 40  $\mu$ m. (B) Representative current-clamp  
1024 recordings of MSNs from WT (black) and homozygous (HOM), *Scn2a*<sup>gtKO/gtKO</sup> (blue) mice were  
1025 obtained at the resting membrane potential (RMP). A series of 400-ms hyperpolarizing and  
1026 depolarizing steps in 50-pA increments were applied to produce the traces. Inset: representative  
1027 trace in response to 350 pA positive current injection. (C) The average number of action potentials  
1028 (APs) generated in response to depolarizing current pulses. Unpaired two-tailed non-parametric  
1029 Mann-Whitney *U*-test for each current pulse: \*\*\**p* < 0.001. (D) Individuals and mean RMP values.  
1030 Unpaired two-tailed Student's *t*-test: \**p* < 0.05. (Ei) Representative traces in response to 100 pA  
1031 negative current injection. *V*<sub>steady-state</sub> (*V*<sub>ss</sub>) is the voltage recorded at 0-10 ms before the end of the  
1032 stimulus. (Eii) Individuals and mean input resistance values at the RMP. Unpaired two-tailed  
1033 Student's *t*-test: \*\*\**p* < 0.001. (F) Typical spikes of MSNs from WT (black) and HOM (blue) mice  
1034 were obtained at the normal RMP. (G) Associated phase-plane plots. (H-L) Individuals and mean  
1035 spike rheobase, voltage threshold, amplitude, fAHP (fast after-hyperpolarization), and half-width  
1036 values. Unpaired two-tailed Student's *t*-test: \**p* < 0.05; \*\**p* < 0.01; \*\*\**p* < 0.001. Data were shown  
1037 as mean  $\pm$  SEM.

1038

1039 **Figure 2**

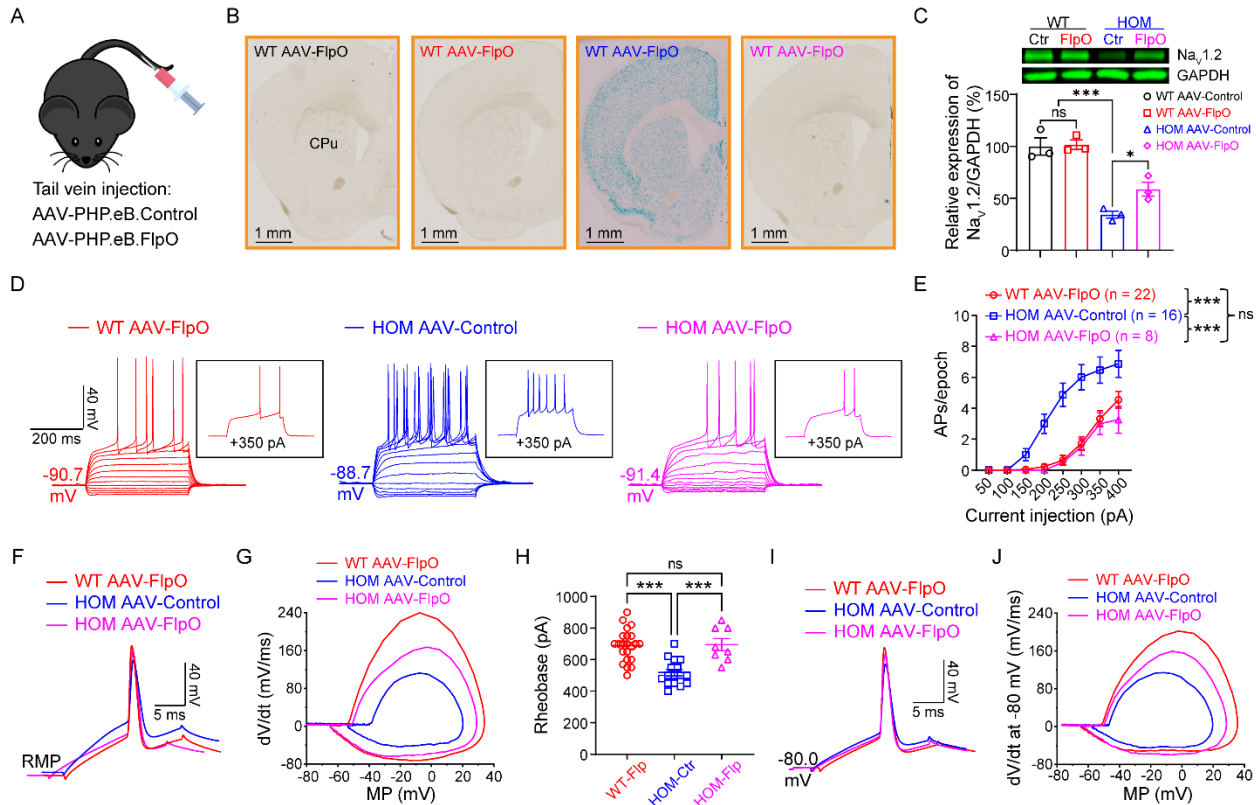

1040

1041 **Fig. 2. Elevated neuronal firing is reversible by FlpO-mediated restoration of Nav1.2**  
1042 **expression in adult Nav1.2-deficient mice.**

1043 **(A)** Cartoon illustration of mice systemically administrated with PHP.eB.AAV-control or AAV-FlpO  
1044 via tail vein injection. **(B)** Coronal views of *LacZ* staining of striatum from WT and *Scn2a*<sup>gtKO/gtKO</sup>  
1045 (HOM) mice injected with AAV-control or AAV-FlpO. Blue staining of HOM mice largely  
1046 disappeared in the AAV-FlpO group. CPu, caudate nucleus and the putamen (dorsal striatum).  
1047 **(C)** The Western blot analysis showed Nav1.2 protein levels in whole-brain tissues from  
1048 *Scn2a*<sup>gtKO/gtKO</sup> (HOM) mice in AAV-Control or AAV-FlpO group. One-way ANOVA with Bonferroni's  
1049 multiple-comparison test: ns, no significance,  $p > 0.05$ ; \* $p < 0.05$ ; \*\*\* $p < 0.001$ . **(D)** Representative  
1050 current-clamp recordings of MSNs from WT mice transduced with AAV-FlpO (red), HOM mice  
1051 transduced with AAV-Control (blue), and HOM mice transduced with AAV-Control (magenta)  
1052 obtained at the RMP. A series of 400-ms hyperpolarizing and depolarizing steps in 50-pA  
1053 increments were applied to produce the traces. Inset: representative trace in response to 350 pA  
1054 positive current injection. **(E)** The average number of APs generated in response to depolarizing  
1055 current pulses at the RMP. Unpaired two-tailed non-parametric Mann-Whitney *U*-test for each  
1056 current pulse: ns, no significance, \* $p > 0.05$ ; \*\*\* $p < 0.001$ . **(F)** Typical spikes of MSNs from WT  
1057 transduced with AAV-FlpO (red), HOM transduced with AAV-Control (blue) and HOM transduced  
1058 with AAV-Control (magenta) were obtained at the normal RMP. **(G)** Associated phase-plane plots.  
1059 **(H)** Individuals and average spike rheobase. Unpaired two-tailed Student's *t*-test: ns, no  
1060 significance,  $p > 0.05$ ; \*\*\* $p < 0.001$ . **(I)** Typical spikes of MSNs from WT mice transduced with  
1061 AAV-FlpO (red), HOM mice transduced with AAV-Control (blue), and HOM mice transduced with  
1062 AAV-Control (magenta) at a fixed membrane potential of -80 mV. **(J)** Associated phase-plane  
1063 plots at -80 mV. Data were shown as mean  $\pm$  SEM.

1064

1065 **Figure 3**

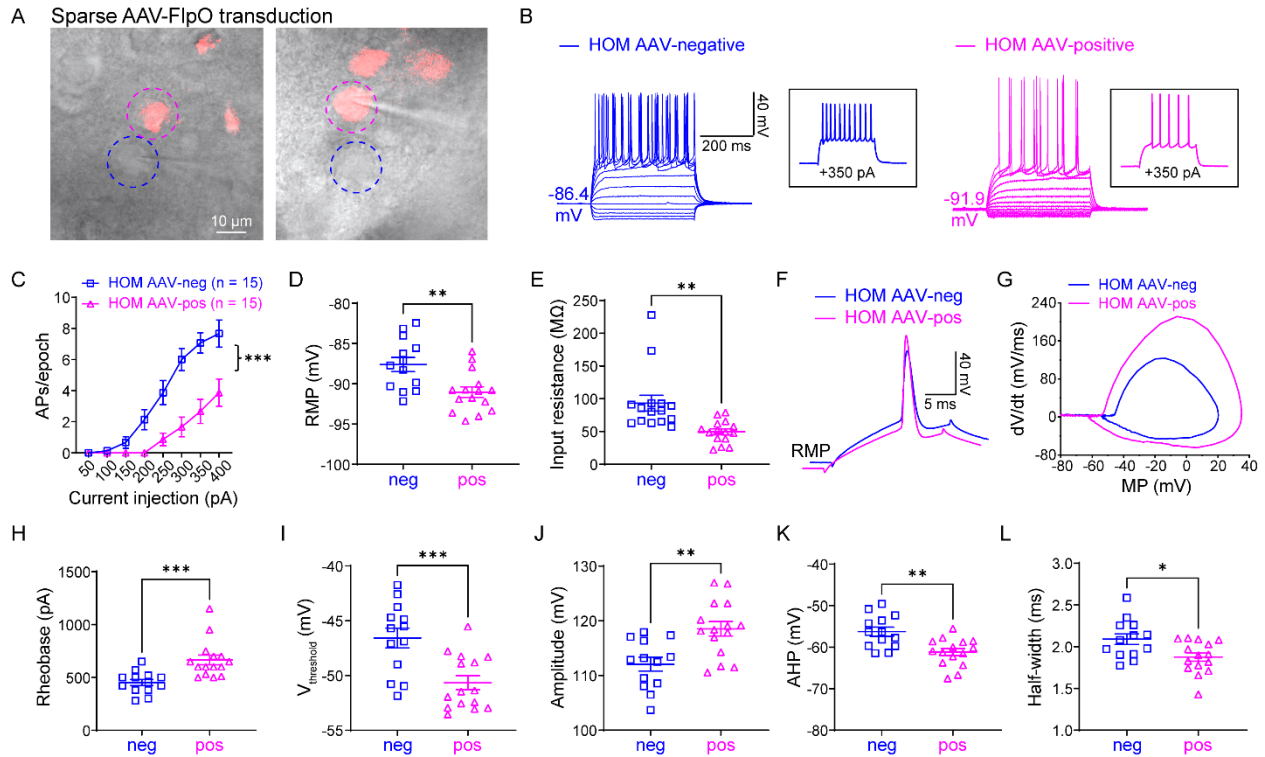

1066

1067

**Fig. 3. Elevated neuronal excitability is autonomous.**

1068 (A) *Scn2a<sup>gtKO/gtKO</sup>* (HOM) mice were injected with a dilute FlpO virus, transducing a subset of  
 1069 neurons in the striatum sparsely. Dashed circles highlight two neighboring AAV-negative (blue  
 1070 circle) and AAV-FlpO-positive (magenta circle) neurons. The images were taken in the cell-  
 1071 attached configuration, and after that, the target neurons were used for whole-cell recordings. (B)  
 1072 Representative current-clamp recordings of AAV-negative (blue) and AAV-FlpO-positive  
 1073 (magenta) MSNs in CPu of *Scn2a<sup>gtKO/gtKO</sup>* mice were obtained at the RMP. A series of 400-ms  
 1074 hyperpolarizing and depolarizing steps in 50-pA increments were applied to produce the traces.  
 1075 Inset: representative trace in response to 350 pA positive current injection. (C) The average  
 1076 number of APs generated in response to depolarizing current pulses. Unpaired two-tailed non-  
 1077 parametric Mann-Whitney *U*-test for each current pulse: \*\*\**p* < 0.001. (D) Individuals and average  
 1078 RMP values. Unpaired two-tailed Student's *t*-test: \*\**p* < 0.01. (E) Individuals and average input  
 1079 resistance values at the RMP. Unpaired two-tailed Student's *t*-test: \*\**p* < 0.01. (F) Typical spikes  
 1080 of MSNs with AAV-negative (blue) and with AAV-FlpO-positive (magenta) in HOM mice were  
 1081 obtained at the RMP. (G) Associated phase-plane plots. (H-L) Individuals and average spike  
 1082 rheobase, voltage threshold, amplitude, fAHP, and half-width values. Unpaired two-tailed  
 1083 Student's *t*-test: \**p* < 0.05; \*\**p* < 0.01; \*\*\**p* < 0.001. Data were shown as mean ± SEM.

1084

1085 **Figure 4**

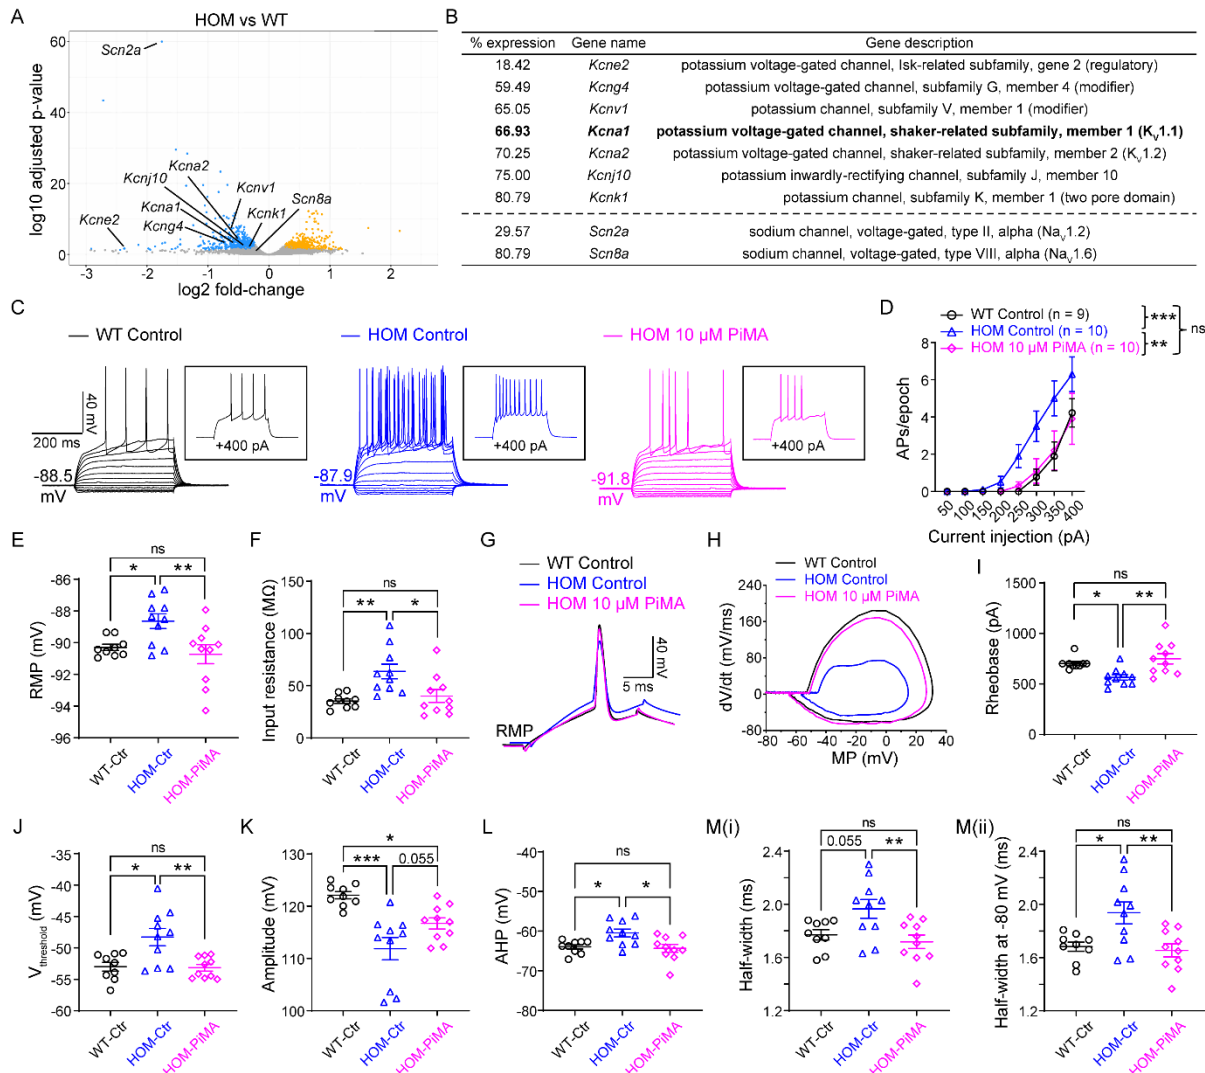

1086

1087 **Fig. 4. Activation of K<sub>v</sub> channels reverses elevated neuronal firings in adult Nav1.2-**  
 1088 **deficient mice.**

1089 (A) Volcano plot displays *Scn2a* and *Scn8a*, as well all potassium channels that are statistically  
 1090 down-regulated in *Scn2a*<sup>gtKO/gtKO</sup> (HOM) mice compared to WT mice identified by RNA-seq.  
 1091 Statistically significantly upregulated genes are shown in yellow and downregulated genes are  
 1092 shown in blue. (B) List of potassium channels that are significantly down-regulated in HOM mice  
 1093 compared to WT. (Hits that are identified from both DESeq2 and edgeR differential expression  
 1094 analysis with False Discovery Rate < 0.05 were listed). “% expression”: percentage expression of  
 1095 the gene in HOM mice considering the value of WT mice as 100%. (n = 4 mice for each group).  
 1096 (C) Representative current-clamp recordings of MSNs from WT slices perfused with 0.1% DMSO  
 1097 in aCSF (WT Control, black), HOM slices perfused with 0.1% DMSO in aCSF (HOM Control,  
 1098 blue), and HOM slices perfused with 0.1% DMSO in aCSF containing PiMA (HOM 10 μM PiMA,  
 1099 magenta) at the RMP. A series of 400-ms hyperpolarizing and depolarizing steps in 50-pA  
 1100 increments were applied to produce the traces. Inset: representative trace in response to 400 pA  
 1101 positive current injection. (D) The average number of APs generated in response to depolarizing  
 1102 current pulses at the RMP. Unpaired two-tailed non-parametric Mann-Whitney U-test for each  
 1103 current pulse: ns, no significance, \*p > 0.05; \*\*p < 0.01; \*\*\*p < 0.001. (E) Individuals and average



1104 RMP values. Unpaired two-tailed Student's *t*-test: ns, no significance, \**p* > 0.05; \**p* < 0.05; \*\**p* <  
1105 0.01. **(F)** Individuals and average input resistance values at the RMP. Unpaired two-tailed  
1106 Student's *t*-test: ns, no significance, \**p* > 0.05; \**p* < 0.05; \*\**p* < 0.01. **(G)** Typical spikes of MSNs  
1107 from WT slices perfused with 0.1% DMSO in aCSF (WT Control, black), HOM slices perfused with  
1108 0.1% DMSO in aCSF (HOM Control, blue), and HOM slices perfused with 0.1% DMSO in aCSF  
1109 containing PiMA (HOM 10 μM PiMA, magenta) were obtained at the RMP. **(H)** Associated phase-  
1110 plane plots. **(I-M)** Individuals and average spike rheobase, voltage threshold, amplitude, fAHP,  
1111 and half-width values. Unpaired two-tailed Student's *t*-test: ns, no significance, \**p* > 0.05; \**p* <  
1112 0.05; \*\**p* < 0.01; \*\*\**p* < 0.001. Data were shown as mean ± SEM.  
1113

1114 **SUPPLEMENTARY MATERIALS**

1115 **Supplementary Figure 1**

A *Tm1a* (knockout first allele, gene trap knockout/gtKO)

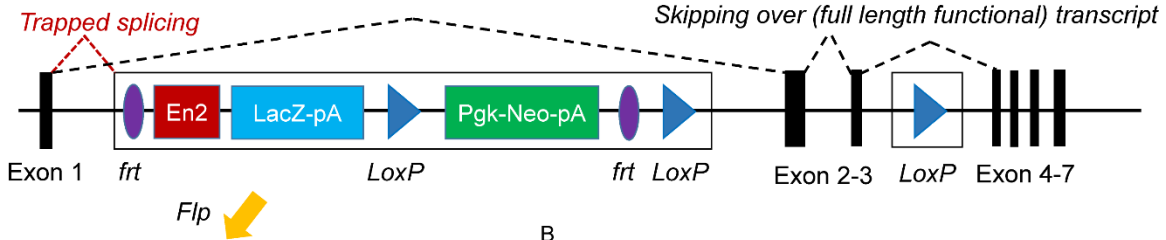

*Tm1c* (conditional/rescue allele)

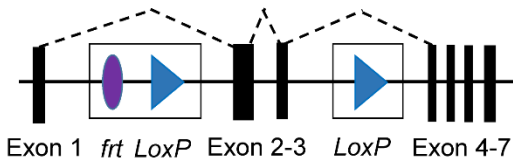

B

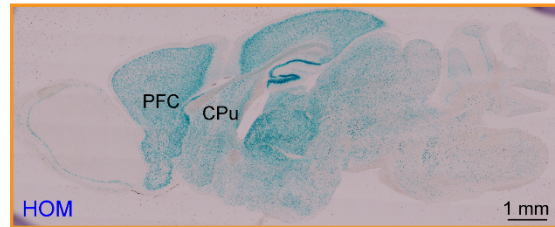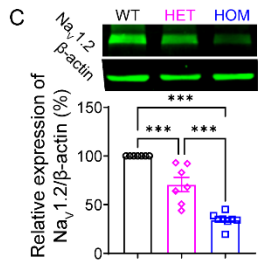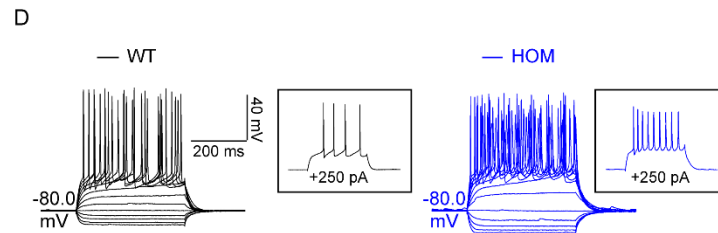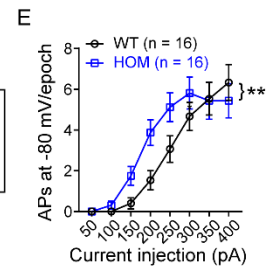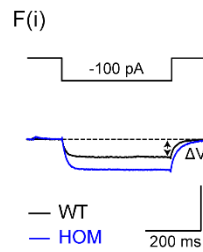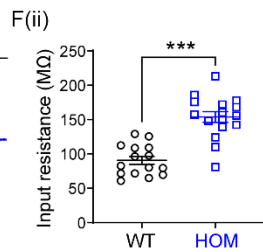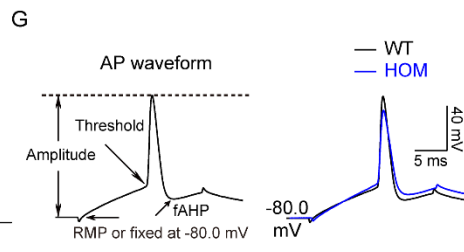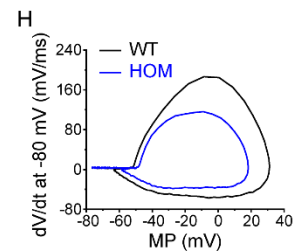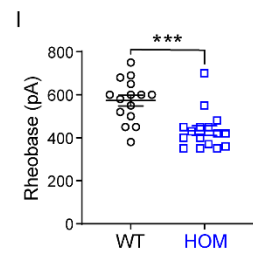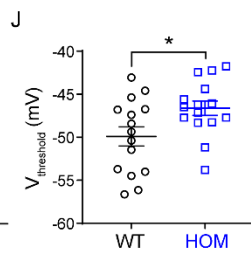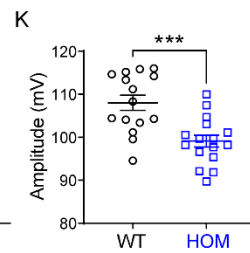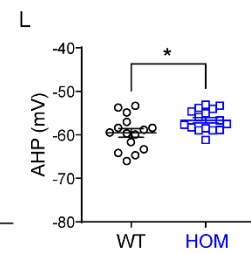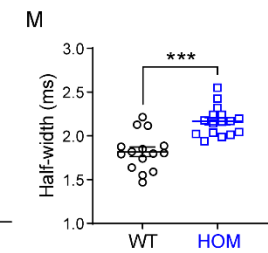

1116

1117 **Figure S1. Elevated neuronal firings of striatal MSNs at a fixed membrane potential of -80**  
 1118 **mV in adult *Nav1.2*-deficient mice. Related to Figure 1.**

1119 (A) gtKO allele has an inserted *tm1a* trapping cassette between the Exon 1 and Exon 2 of *Scn2a*  
 1120 gene in the genome, which traps the transcription from Exon 1 to *tm1a* cassette, resulting in  
 1121 “gene-trap” knockout of *Scn2a*. In the presence of Flp recombinase, *frt* sites flanked trapping  
 1122 cassette will be removed, producing conditional (“rescue”) allele that allows the expression of  
 1123 *Scn2a* at the WT level. *frt*, Flp recognition target (purple); *En2*, engrailed-2 splice acceptor (red);  
 1124 *LacZ*, *lacZ* β-galactosidase (light blue); *LoxP*, locus of X-over P1 (dark blue); and *Neo*, neomycin

1125 (green). **(B)** gtKO cassette contains a *LacZ* element and is driven by the native *Scn2a* promoter.  
1126 Thus, the *LacZ* expression can be used as a surrogate of *Scn2a* expression. Representative *LacZ*  
1127 staining of a sagittal slice from a *Scn2a<sup>gtKO/gtKO</sup>* (HOM) mouse showing a strong blue signal across  
1128 the brain including the prefrontal cortex (PFC) and dorsal striatum (CPu, caudate nucleus and the  
1129 putamen). **(C)** Upper: Representative Western blots of striatal tissues from WT (black circle), HET  
1130 (magenta diamond), and HOM (blue square) mice. Lower: associated quantification of  $\text{Na}_v1.2$   
1131 protein. One-way ANOVA followed by Tukey's multiple-comparison test:  $***p < 0.001$ . **(D)**  
1132 Representative current-clamp recordings of MSNs from WT (black) and HOM (blue) mice were  
1133 obtained at a fixed membrane potential of -80 mV. A series of 400-ms hyperpolarizing and  
1134 depolarizing steps in 50-pA increments were applied to produce the traces. Inset: representative  
1135 trace in response to 250 pA positive current injection. **(E)** The average number of APs generated  
1136 in response to depolarizing current pulses at -80 mV. Unpaired two-tailed non-parametric Mann-  
1137 Whitney *U*-test for each current pulse:  $**p < 0.01$ . **(Fi)** Representative traces in response to 100  
1138 pA negative current injection.  $V_{\text{steady-state}}$  ( $V_{\text{ss}}$ ) is the voltage recorded at 0-10 ms before the end of  
1139 the stimulus. **(Fii)** Individuals and average input resistance values at -80 mV. Unpaired two-tailed  
1140 Student's *t*-test:  $***p < 0.001$ . **(G)** Left: plot of a typical AP showed its various phases. Right:  
1141 typical spikes of MSNs from WT (black) and HOM (blue) mice were obtained at a fixed membrane  
1142 potential of -80 mV. **(H)** Associated phase-plane plots. **(I-M)** Individuals and average spike  
1143 rheobase, voltage threshold, amplitude, fAHP (fast after-hyperpolarization), and half-width values.  
1144 unpaired two-tailed Student's *t*-test:  $*p < 0.05$ ;  $***p < 0.001$ . Data were shown as mean  $\pm$  SEM.  
1145

1146 **Supplementary Figure 2**

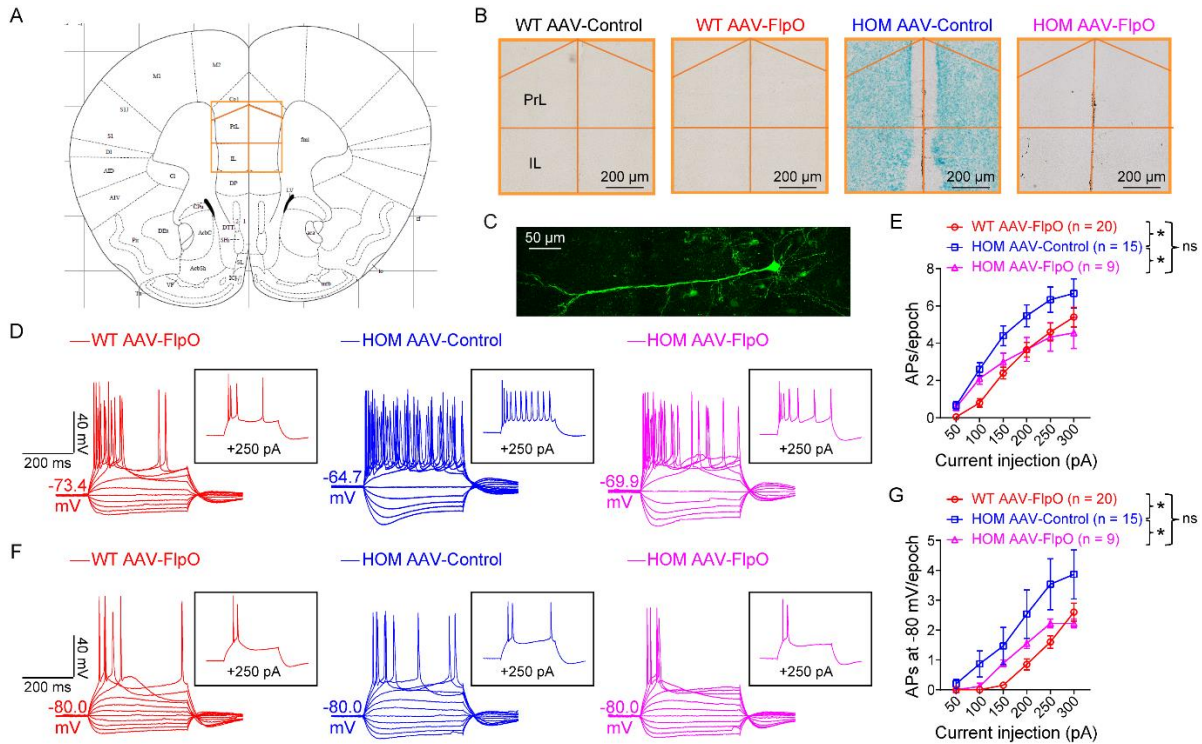

1147  
1148 **Figure S2. Elevated neuronal firings of layer V pyramidal cells in the mPFC are reversible**  
1149 **by FlpO-mediated rescue in adult  $Nav1.2$ -deficient mice. Related to Figure 2.**

1150 (A-B) *LacZ* staining of coronal brain slices containing mPFC from WT and *Scn2a<sup>gtKO/gtKO</sup>* (HOM)  
1151 mice, which were systemically administered with AAV-Control or AAV-FlpO. PrL, prelimbic  
1152 cortex; IL, infralimbic cortex. (C) A typical layer V pyramidal neuron in the mPFC was labeled by  
1153 neurobiotin. Scale bar, 50  $\mu$ m. (D) Representative current-clamp recordings of pyramidal cells  
1154 from WT mice transduced with AAV-FlpO (red), HOM mice transduced with AAV-Control (blue),  
1155 and HOM mice transduced with AAV-Control (magenta) at the RMP. A series of 400-ms  
1156 hyperpolarizing and depolarizing steps in 50-pA increments were applied to produce the traces.  
1157 Inset: representative trace in response to 250 pA positive current injection. (E) The average  
1158 number of APs generated in response to depolarizing current pulses at the RMP. Unpaired two-  
1159 tailed non-parametric Mann-Whitney *U*-test for each current pulse: ns, no significance,  $p > 0.05$ ;  
1160 \* $p < 0.05$ . (F) Representative current-clamp recordings of layer V pyramidal cells in the mPFC  
1161 from WT transduced with AAV-FlpO (red), HOM transduced with AAV-Control (blue) and HOM  
1162 transduced with AAV-Control (magenta) at a fixed membrane potential of -80 mV. A series of  
1163 400-ms hyperpolarizing and depolarizing steps in 50-pA increments were applied to produce the  
1164 traces. Inset: representative trace in response to 250 pA positive current injection. (G) The  
1165 average number of APs generated in response to depolarizing current pulses at -80 mV.  
1166 Unpaired two-tailed non-parametric Mann-Whitney *U*-test for each current pulse: ns, no  
1167 significance,  $p > 0.05$ ; \* $p < 0.05$ . Data were shown as mean  $\pm$  SEM.

1168



1169 **Supplementary Figure 3**

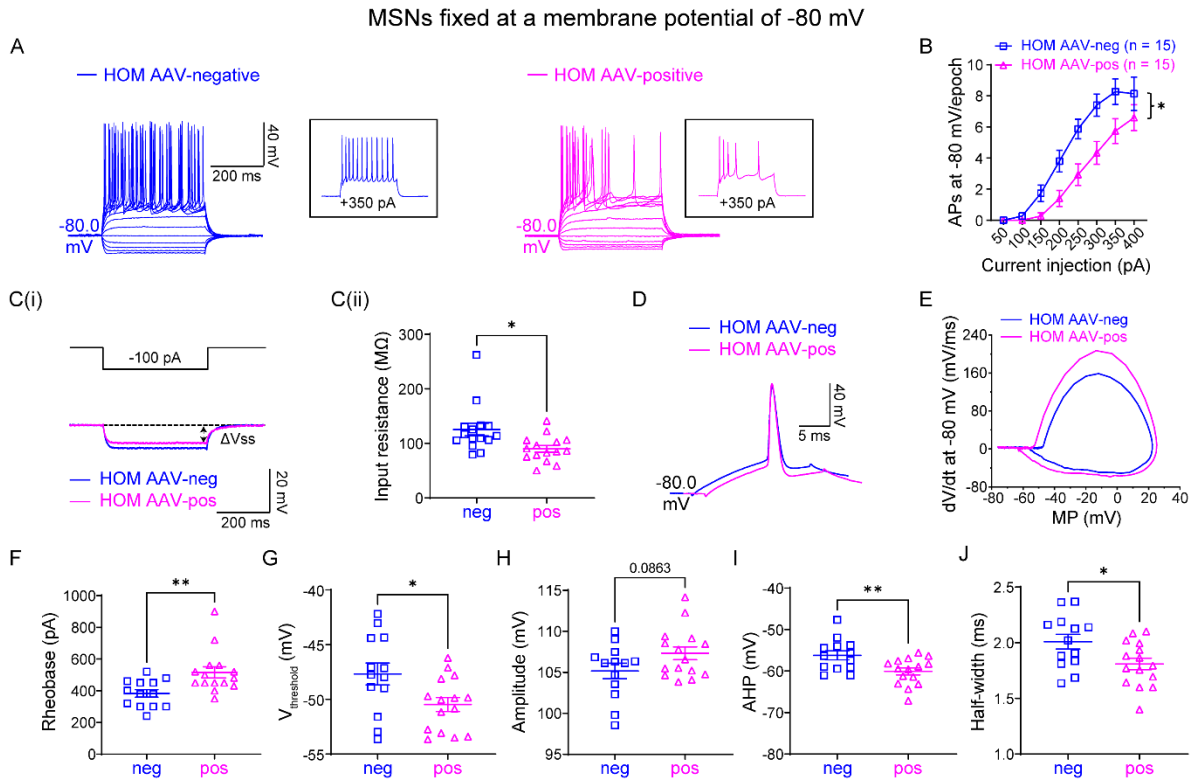

1170

1171 **Figure S3. Ex vivo recordings of MSNs at a fixed membrane potential of -80 mV in adult**  
 1172 **Na<sub>v</sub>1.2-deficient mice with a dilute AAV-FlpO-mCherry injection. Related to Figure 3.**

1173 (A) Representative current-clamp recordings of MSNs with AAV-negative (blue) and with AAV-  
 1174 FlpO-positive (magenta) in *Scn2a<sup>gtKO/gtKO</sup>* (HOM) mice were obtained at a fixed membrane  
 1175 potential of -80 mV. A series of 400-ms hyperpolarizing and depolarizing steps in 50-pA  
 1176 increments were applied to produce the traces. Inset: representative trace in response to 350 pA  
 1177 positive current injection. (B) The average number of APs generated in response to depolarizing  
 1178 current pulses. Unpaired two-tailed non-parametric Mann-Whitney *U*-test for each current pulse:  
 1179 \**p* < 0.05. (C*i*) Representative traces in response to 100 pA negative current injection. *V*<sub>steady-state</sub>  
 1180 (*V*<sub>ss</sub>) is the voltage recorded at 0-10 ms before the end of the stimulus. (C*ii*) Individuals and  
 1181 average input resistance values at -80 mV. Unpaired two-tailed Student's *t*-test: \**p* < 0.05. (D)  
 1182 Typical spikes of MSNs with AAV-negative (blue) or AAV-FlpO-positive (magenta) in HOM mice  
 1183 were obtained at a fixed membrane potential of -80 mV. (E) Associated phase-plane plots at -80  
 1184 mV. (F-J) Individuals and average spike rheobase, voltage threshold, amplitude, fAHP, and half-  
 1185 width values. Unpaired two-tailed Student's *t*-test: ns, no significance, *p* > 0.05; \**p* < 0.05; \*\**p* <  
 1186 0.01. Data were shown as mean ± SEM.

1187

1188 **Supplementary Figure 4**

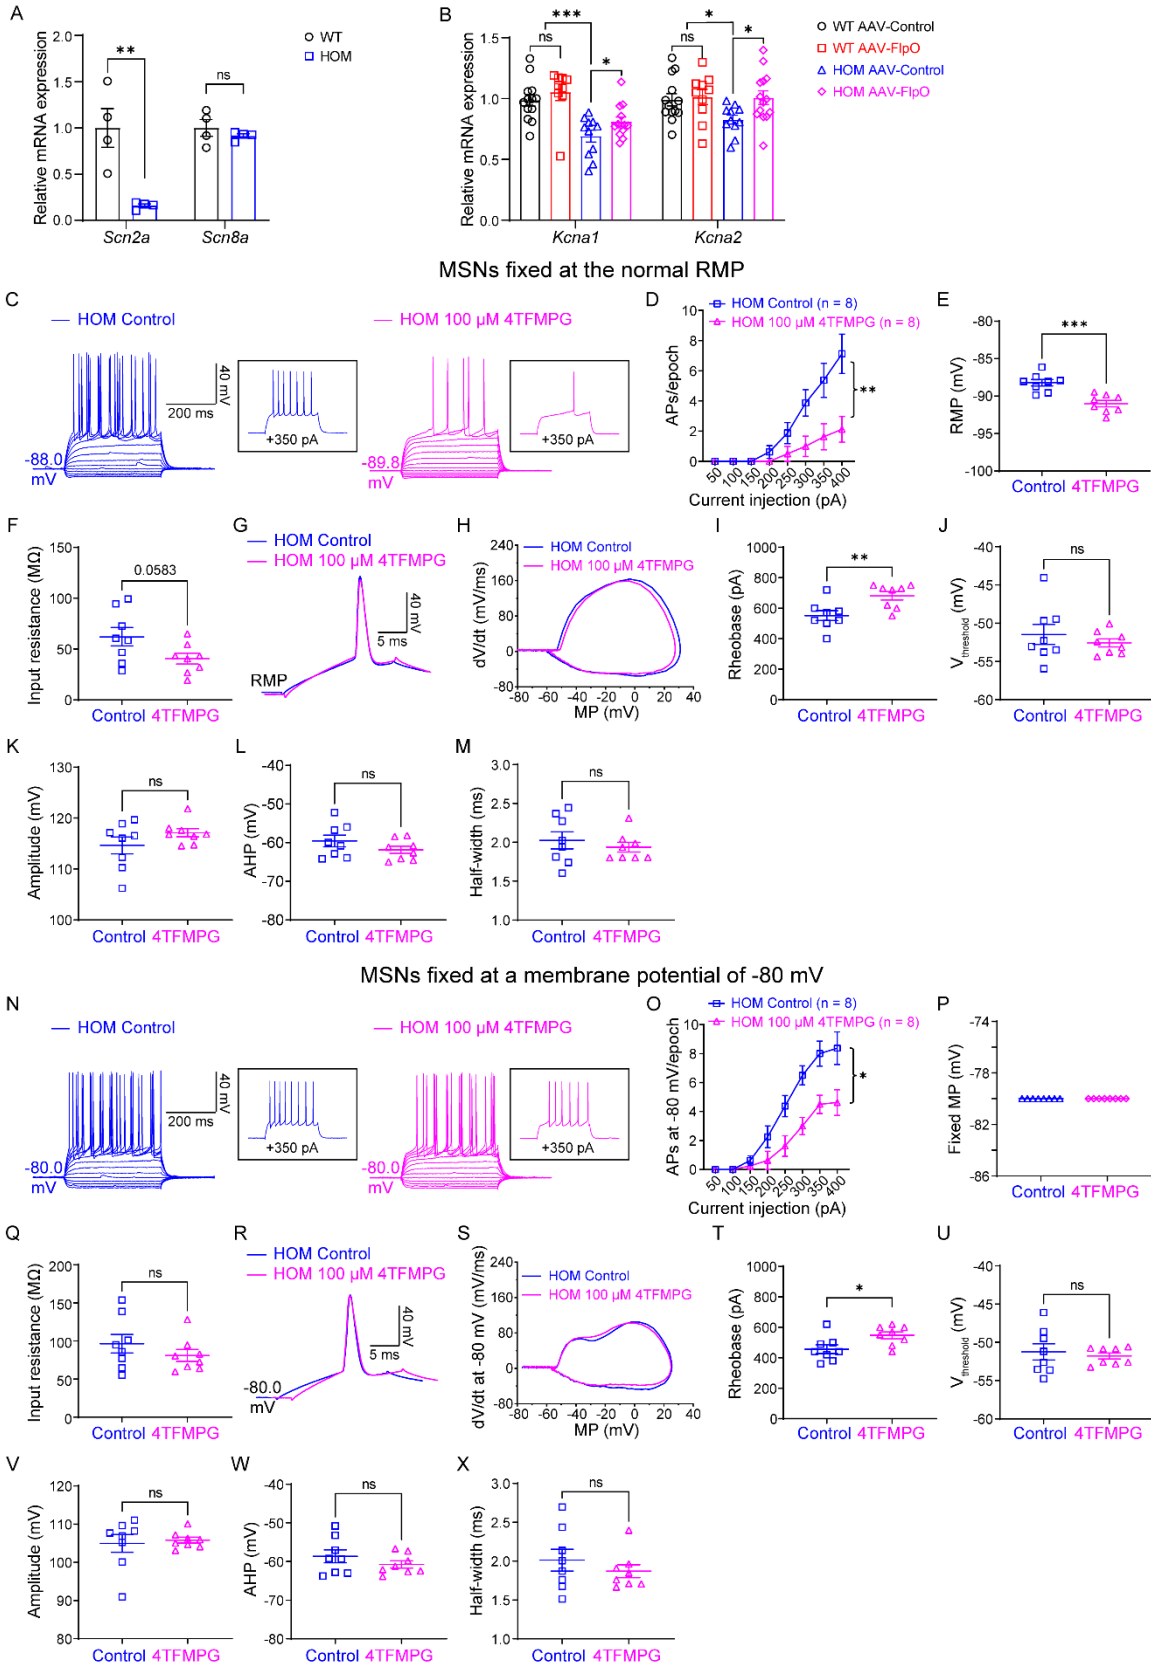

1190 **Figure S4. Specific activation of Kv1.1 channel by 4TFMPG reverses the elevated neuronal**  
1191 **firings in adult Nav1.2-deficient mice. Related to Figure 4.**

1192 (A) Quantitative (q)PCR analysis of *Scn2a* and *Scn8a* mRNA in the striatum samples from WT  
1193 and *Scn2a<sup>gtKO/gtKO</sup>* mice. Unpaired two-tailed Student's *t*-test for each group: ns, no significance,  
1194 \**p* > 0.05; \*\**p* < 0.01. (B) qPCR analysis of *Kcna1* and *Kcna2* mRNA in the striatum samples from  
1195 WT and HOM mice transduced with AAV-Control or AAV-FlpO, showing that the downregulated  
1196 mRNA levels of Kv1.1 and Kv1.2 were reversible by FlpO-mediated restoration of Nav1.2  
1197 expression in adult Nav1.2-deficient mice. Unpaired two-tailed Student's *t*-test: ns, no  
1198 significance, \**p* > 0.05; \**p* < 0.05; \*\*\**p* < 0.001. (C) Representative current-clamp recordings of  
1199 MSNs from HOM slices perfused with aCSF (HOM Control, blue) and HOM slices perfused with  
1200 aCSF containing 4TFMPG (HOM 100 μM 4TFMPG, magenta) at the RMP. A series of 400-ms  
1201 hyperpolarizing and depolarizing steps in 50-pA increments were applied to produce the traces.  
1202 Inset: representative trace in response to 350 pA positive current injection. (D) The average  
1203 number of APs generated in response to depolarizing current pulses at the RMP. Unpaired two-  
1204 tailed non-parametric Mann-Whitney *U*-test for each current pulse: \*\**p* < 0.01. (E) Individuals and  
1205 average spike RMP values. Unpaired two-tailed Student's *t*-test: \*\*\**p* < 0.001. (F) Individuals and  
1206 average input resistance values at the RMP. Unpaired two-tailed Student's *t*-test: *p* = 0.0583. (G)  
1207 Typical spikes of MSNs from HOM slices perfused with aCSF (HOM Control, blue) and HOM  
1208 slices perfused with aCSF containing 4TFMPG (HOM 100 μM 4TFMPG, magenta) were obtained  
1209 at the RMP. (H) Associated phase-plane plots. (I-M) Individuals and average spike rheobase,  
1210 voltage threshold, amplitude, fAHP, and half-width values. (N) Representative current-clamp  
1211 recordings of MSNs from HOM slices perfused with aCSF (HOM Control, blue) and HOM slices  
1212 perfused with aCSF containing 4TFMPG (HOM 100 μM 4TFMPG, magenta) at a fixed membrane  
1213 potential of -80 mV. A series of 400-ms hyperpolarizing and depolarizing steps in 50-pA  
1214 increments were applied to produce the traces. Inset: representative trace in response to 350 pA  
1215 positive current injection. (O) The average number of APs generated in response to depolarizing  
1216 current pulses at -80 mV. Unpaired two-tailed non-parametric Mann-Whitney *U*-test for each  
1217 current pulse: \**p* < 0.05. (P) fixed MP values for recording. (Q) Individuals and average input  
1218 resistance values at -80 mV. Unpaired two-tailed Student's *t*-test: ns, no significance, \**p* > 0.05.  
1219 (R) Typical spikes of MSNs from *Scn2a<sup>gtKO/gtKO</sup>* slices perfused with aCSF (HOM Control, blue)  
1220 and *Scn2a<sup>gtKO/gtKO</sup>* slices perfused with aCSF containing 4TFMPG (HOM 100 μM 4TFMPG,  
1221 magenta) were obtained at a fixed membrane potential of -80 mV. (S) Associated phase-plane  
1222 plots. (T-X) Individuals and average spike rheobase, voltage threshold, amplitude, fAHP, and half-  
1223 width values. Unpaired two-tailed Student's *t*-test: ns, no significance, \**p* > 0.05; \**p* < 0.05. Data  
1224 were shown as mean ± SEM.

1225

1226

1227 **Supplementary Figure 5**

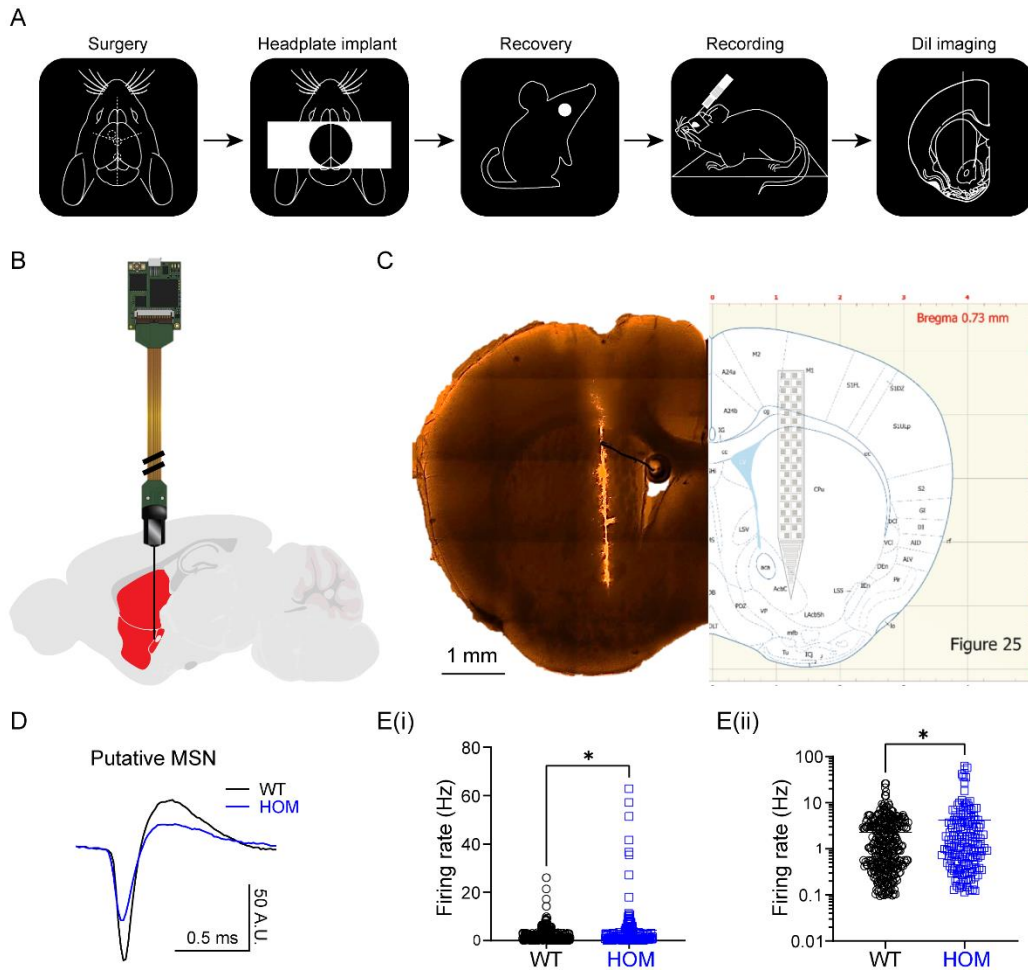

1228

1229 **Figure S5. Elevated *in vivo* neuronal firings of putative striatal MSNs in adult  $Nav1.2$ -**  
 1230 **deficient mice.**

1231 **(A)** Cartoon icons showing 5 steps in the *Neuropixels* recording experiment pipeline. **(B)** A cartoon  
 1232 illustration of a *Neuropixels* probe inserted into the striatum. **(C)** Dil staining of *Neuropixels* probe  
 1233 after recording in the mouse brain matched with brain map (the right panel was adapted from  
 1234 Figure 25 in the *Paxinos and Franklin's The Mouse Brain in Stereotaxic Coordinates*). **(D)**  
 1235 Representative spike waveforms of *Neuropixels* recordings from putative MSNs of WT (black)  
 1236 and HOM (blue) mice. **(Ei)**: Firing rate of putative MSNs of WT and HOM mice. **(Eii)**: y-axis in log  
 1237 scale to show the firing rate of putative MSNs.  $n = 3$  mice for each genotype; unpaired two-tailed  
 1238 Welch's  $t$ -test:  $*p < 0.05$ . Data were shown as mean  $\pm$  SEM.

1239
